# Supplementary material for: (4 + 2) cyclization of aza-o-quinone methides with azlactones: construction of biologically important dihydroquinolinone frameworks
Source: Royal Society of Chemistry journal article supplement (doi:10.1039/d0ob02388d), 2021-01-01
Supplement: d0ob02388d1.pdf [file d0ob02388d1.pdf]

## *Supporting Information for*

### **(4+2) Cyclization of Aza-*o*-quinone Methides with Azlactones: Construction of Biologically Important Dihydroquinolinone Framework**

Hai-Qing Wang<sup>a,‡</sup>, Wenjing Ma<sup>b,‡</sup>, Ao Sun<sup>a,‡</sup>, Xin-Yue Sun<sup>a</sup>, Chao Jiang<sup>b,\*</sup>,  
Yu-Chen Zhang<sup>a,\*</sup> and Feng Shi<sup>a,\*</sup>

<sup>a</sup>*School of Chemistry and Materials Science, Jiangsu Normal University, Xuzhou, 221116, P. R.*

*China*

<sup>b</sup>*Core Facility Center of Affiliated Hospital of Nanjing Medical University, Nanjing, 210029, P. R.*

*China*

<sup>‡</sup>*These authors contributed equally to this work.*

*E-mail: fshi@jsnu.edu.cn; zhangyc@jsnu.edu.cn; jc\_484@163.com*

#### **Contents:**

**1. NMR spectra of products 3-5 and compound I (S2-S33)**

**2. X-ray single crystal data for product 3aa (S34-S35)**

## 1. NMR spectra of products 3-5 and compound I

$^1\text{H}$  NMR (400 MHz,  $\text{CDCl}_3$ ) of compound **3aa**:

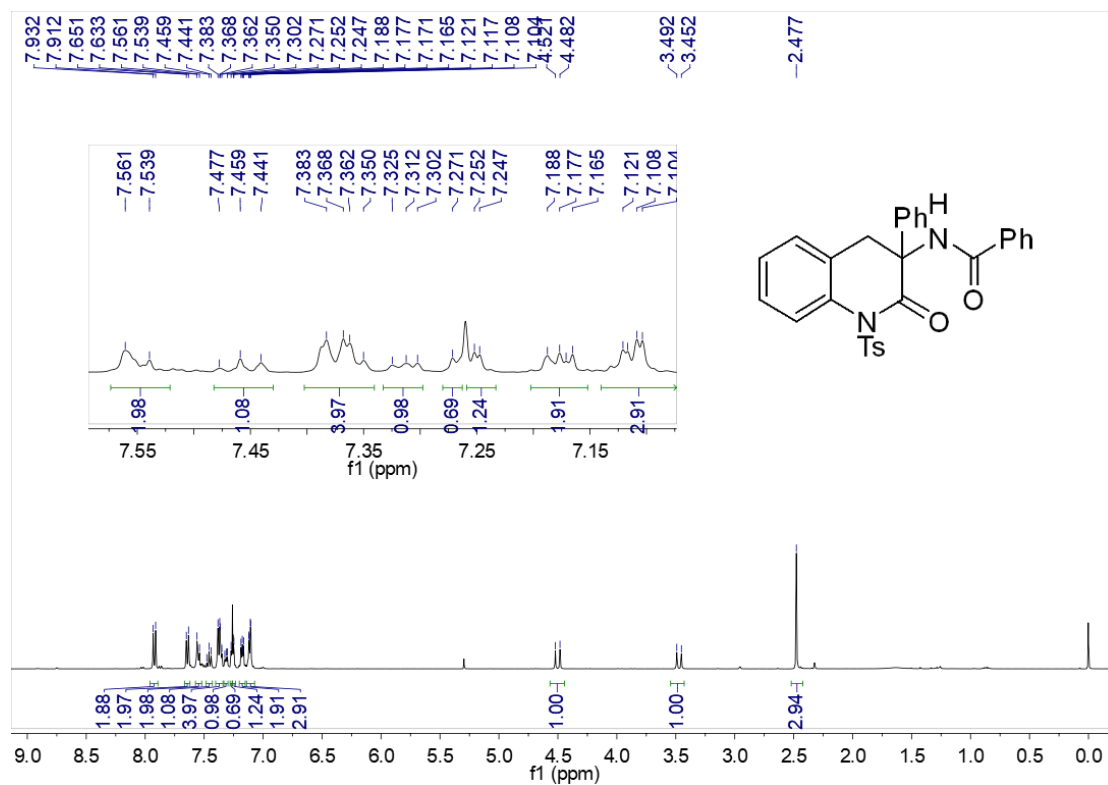

$^{13}\text{C}$  NMR (100 MHz,  $\text{CDCl}_3$ ) of compound **3aa**:

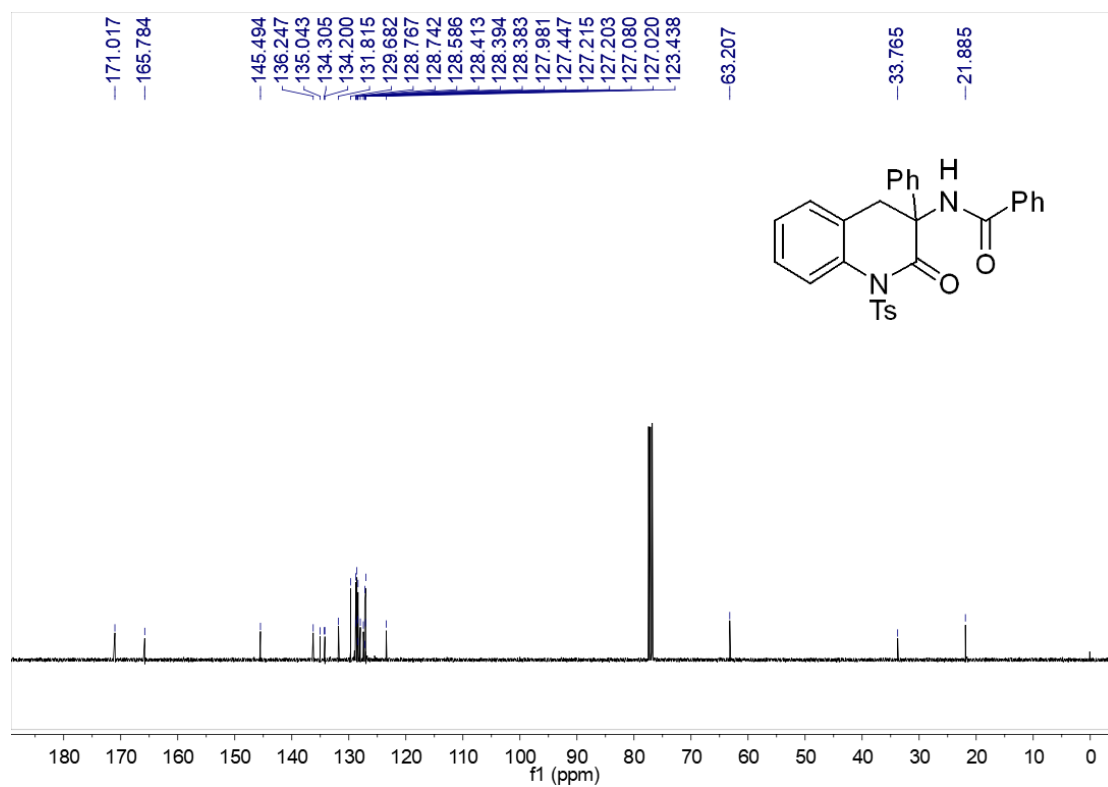

$^1\text{H}$  NMR (400 MHz,  $\text{CDCl}_3$ ) of compound **3ba**:

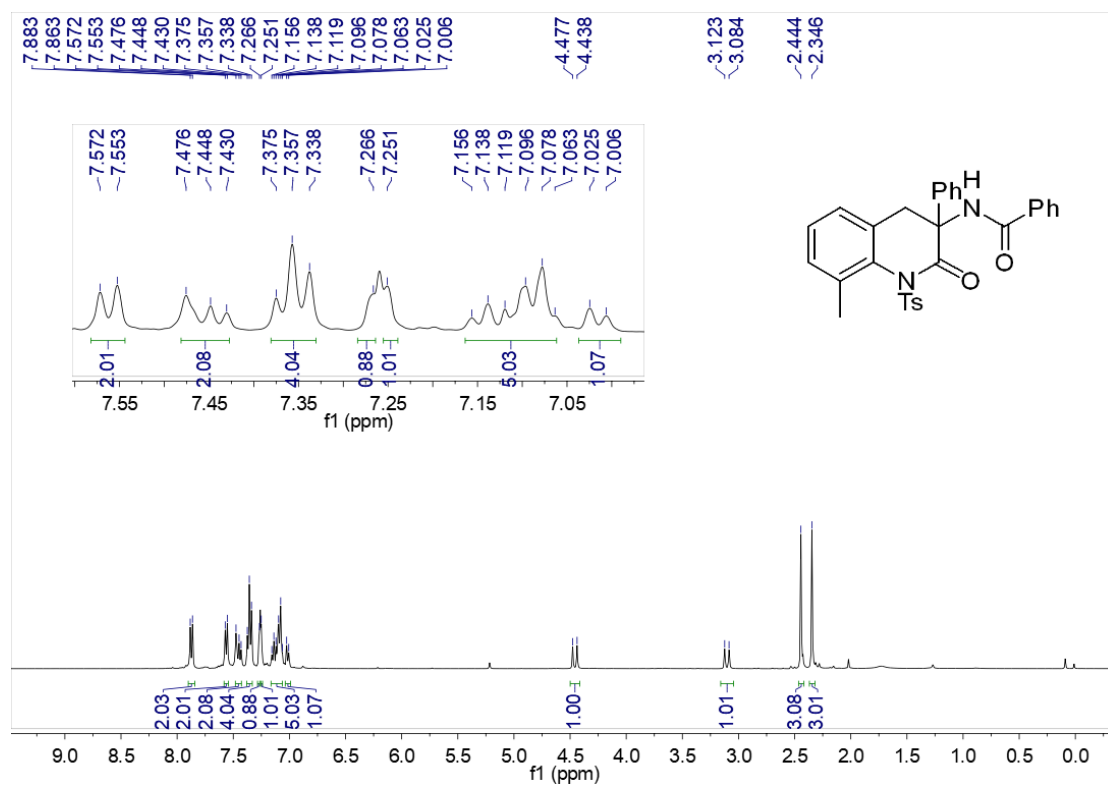

$^{13}\text{C}$  NMR (100 MHz,  $\text{CDCl}_3$ ) of compound **3ba**:

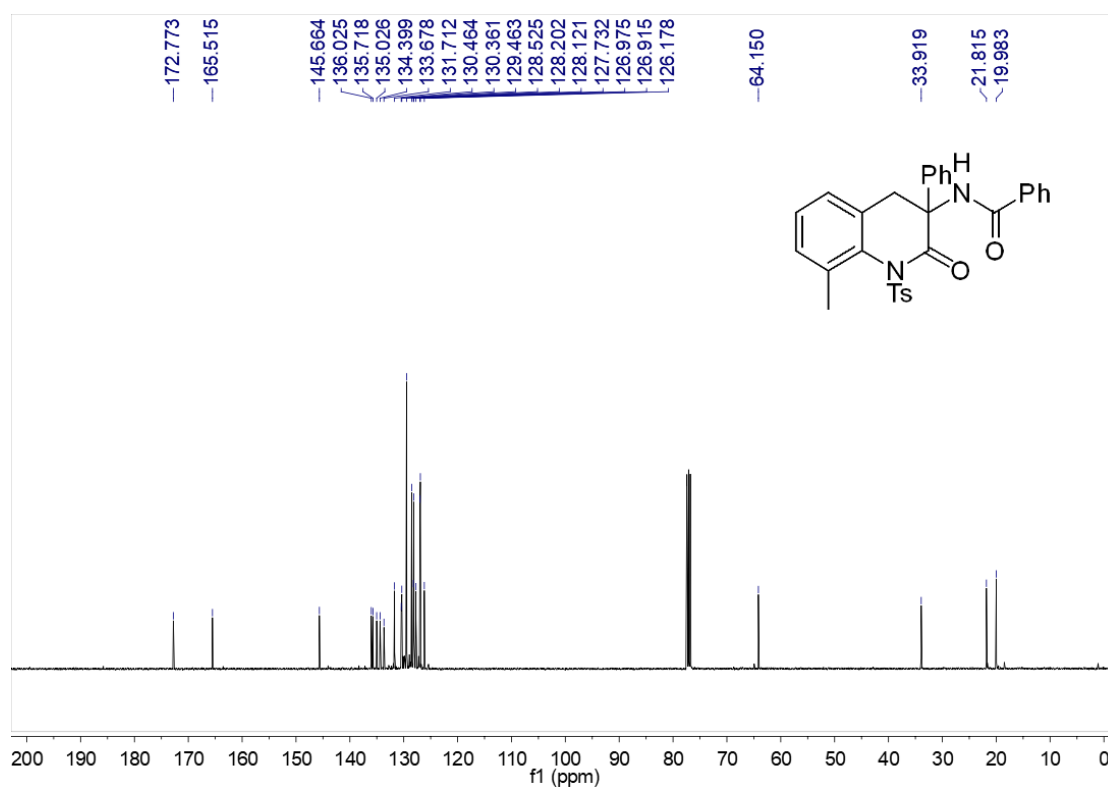

$^1\text{H}$  NMR (400 MHz,  $\text{CDCl}_3$ ) of compound **3ca**:

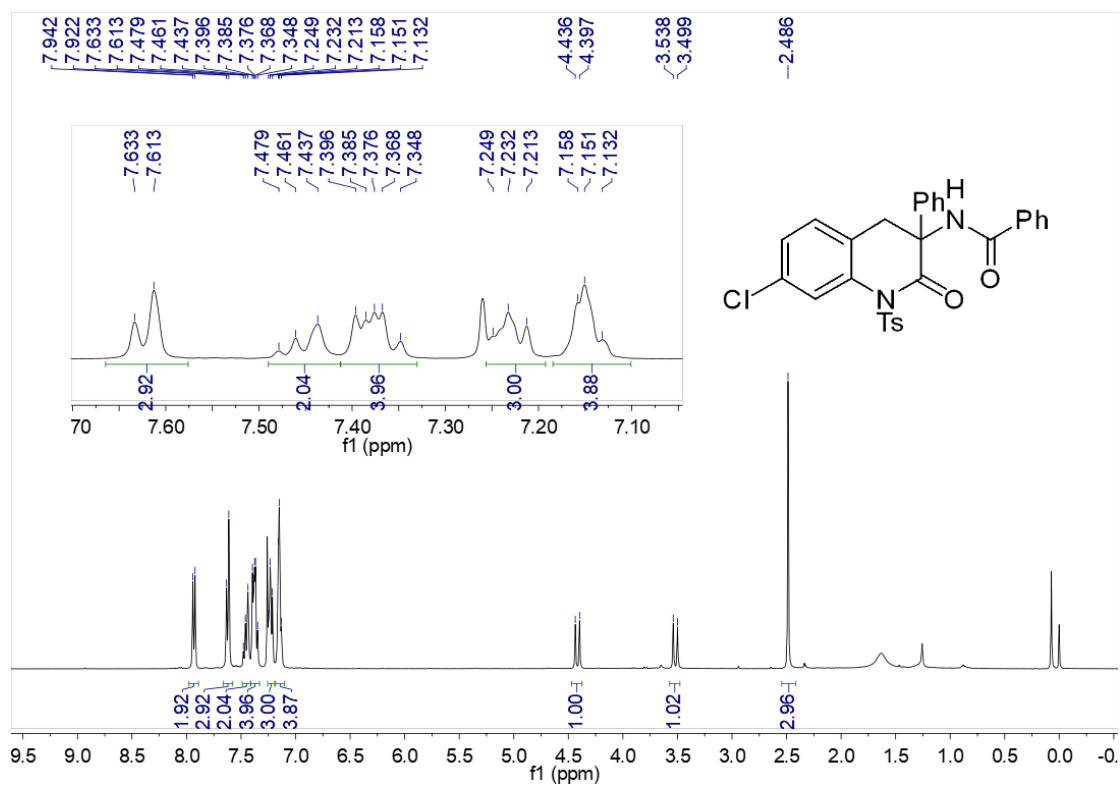

$^{13}\text{C}$  NMR (100 MHz,  $\text{CDCl}_3$ ) of compound **3ca**:

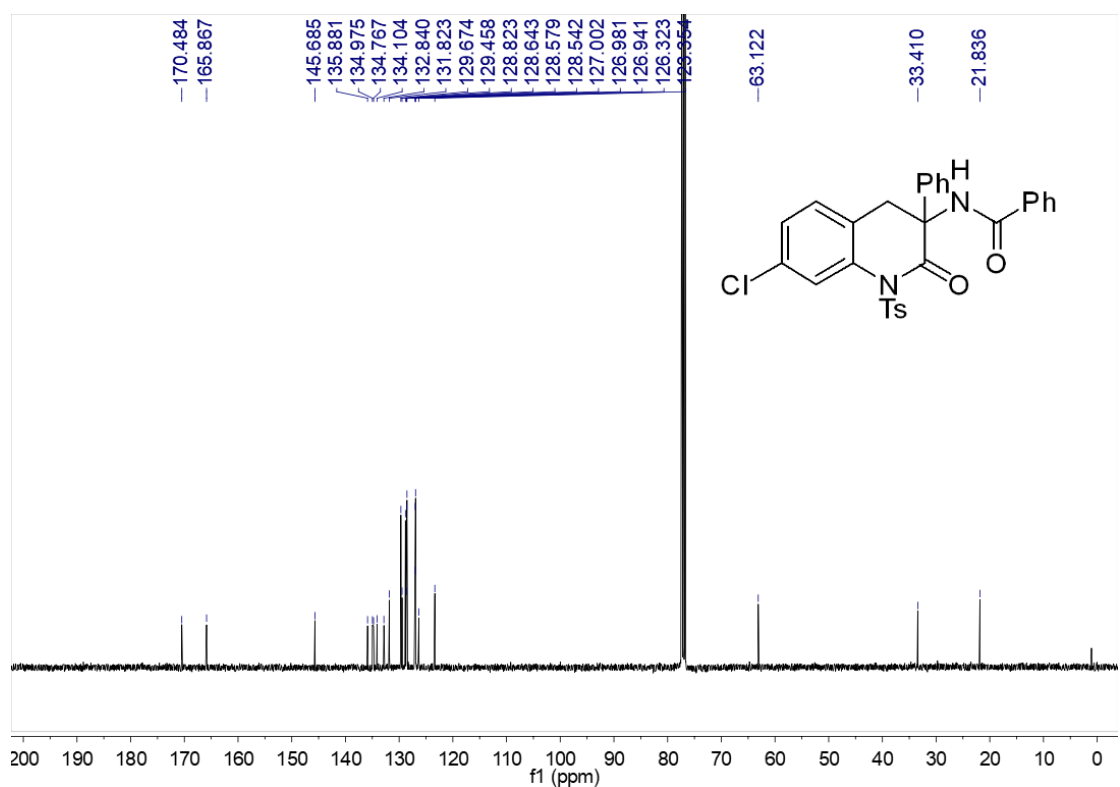

$^1\text{H}$  NMR (400 MHz,  $\text{CDCl}_3$ ) of compound **3da**:

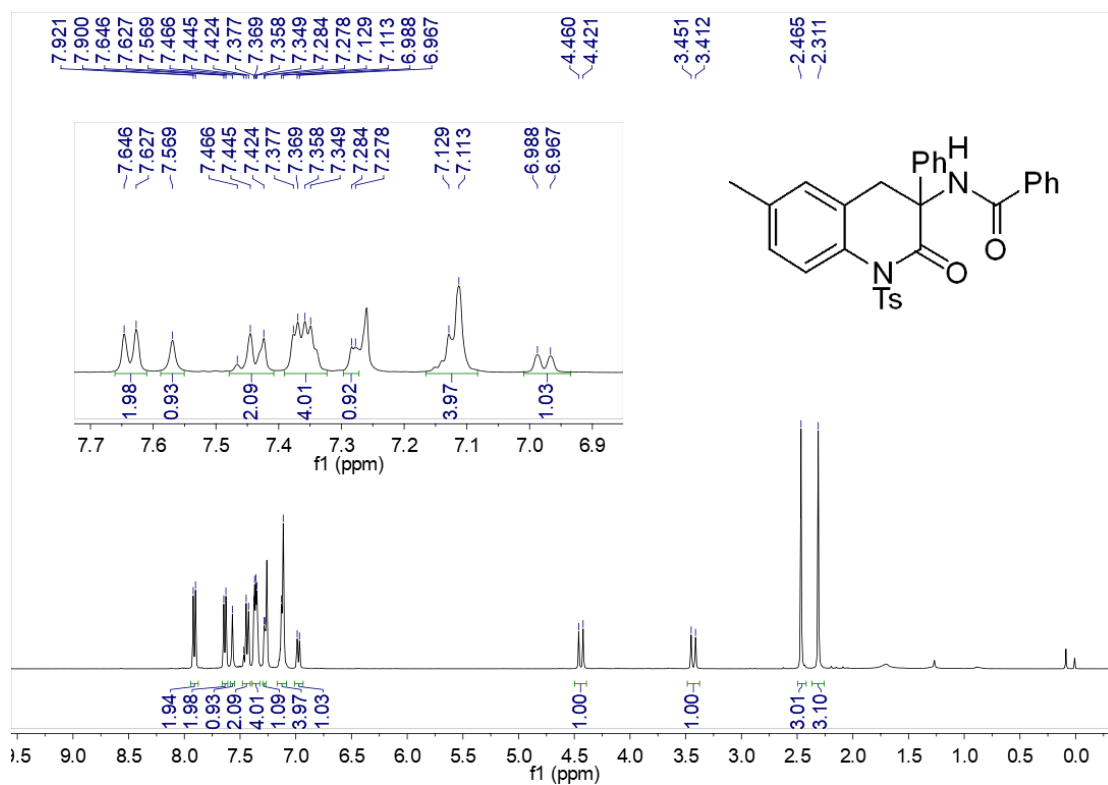

$^{13}\text{C}$  NMR (100 MHz,  $\text{CDCl}_3$ ) of compound **3da**:

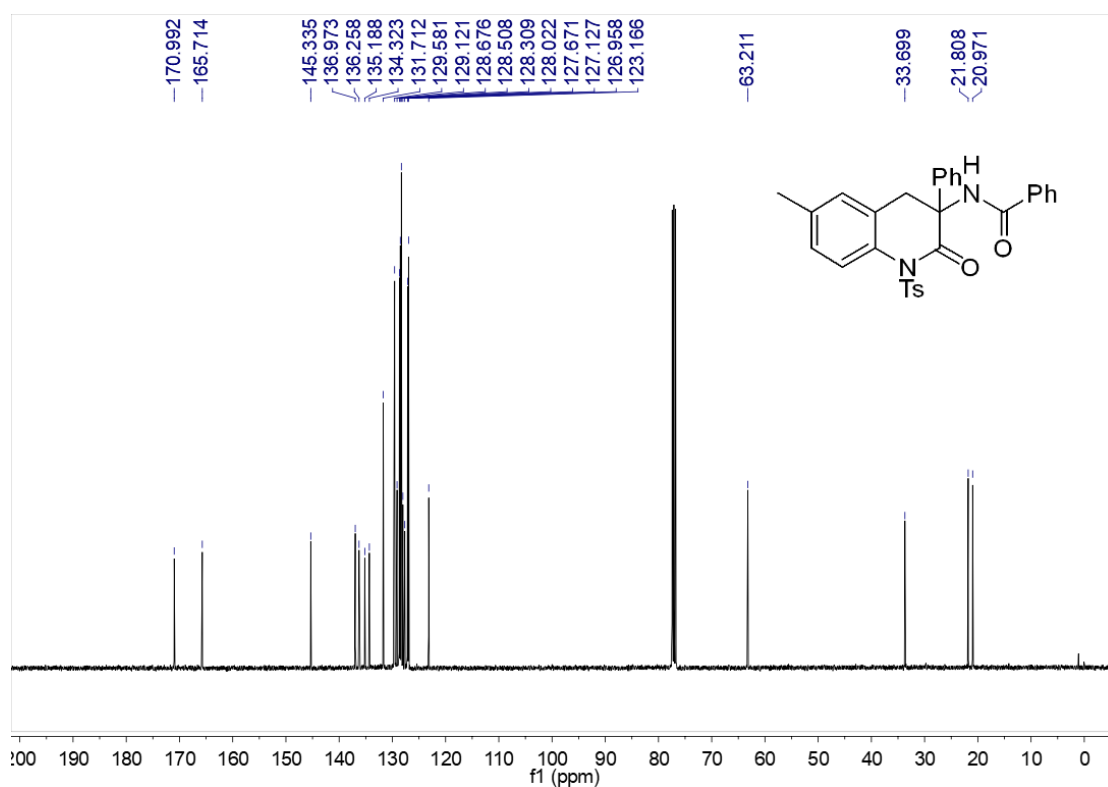

$^1\text{H}$  NMR (400 MHz,  $\text{CDCl}_3$ ) of compound **3ea**:

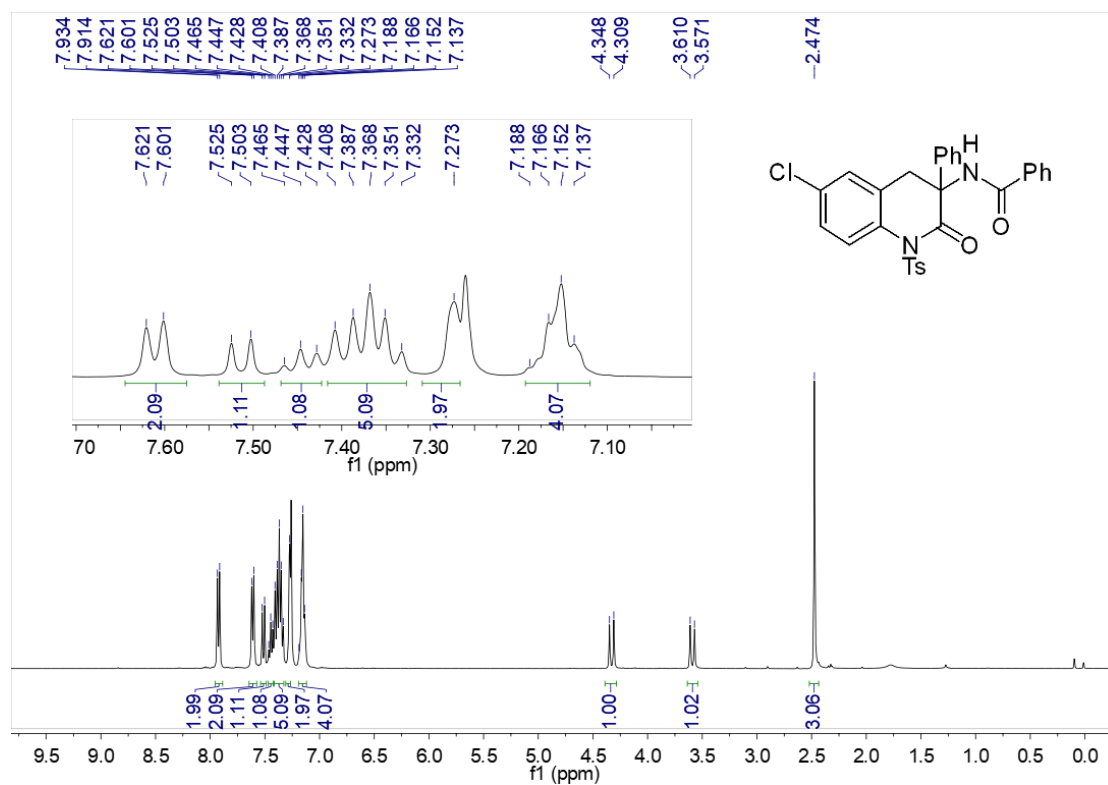

$^{13}\text{C}$  NMR (100 MHz,  $\text{CDCl}_3$ ) of compound **3ea**:

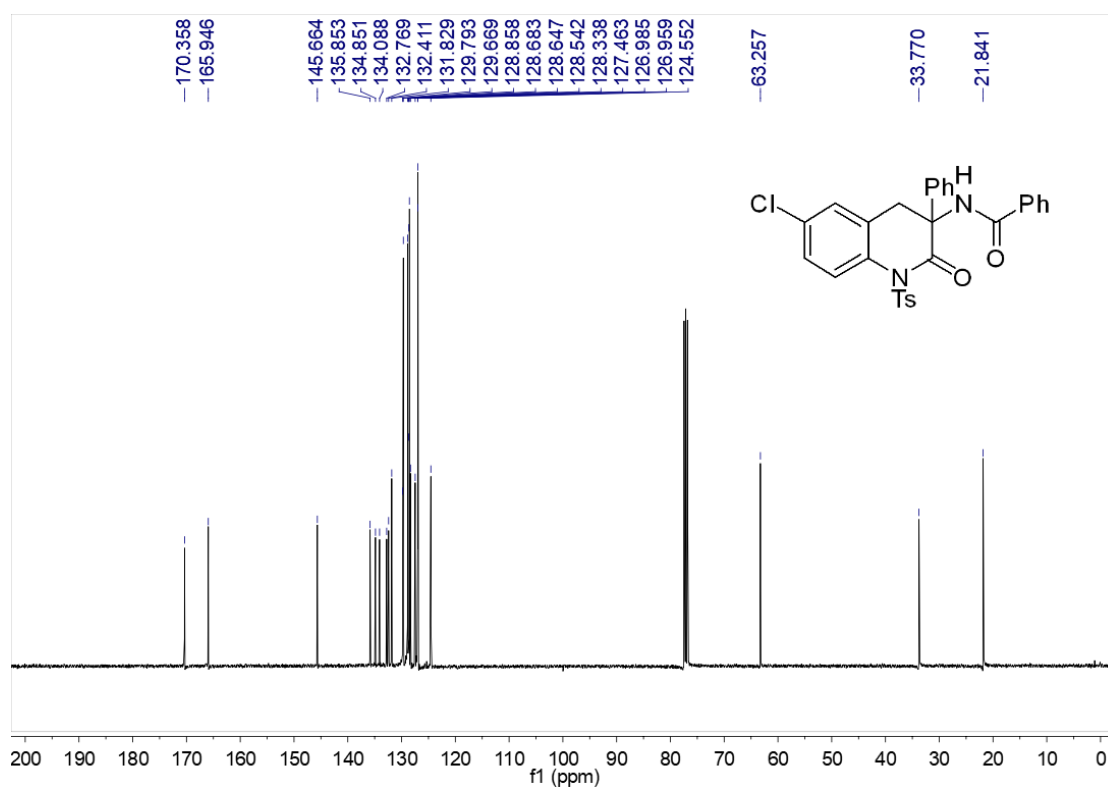

$^1\text{H}$  NMR (400 MHz,  $\text{CDCl}_3$ ) of compound **3fa**:

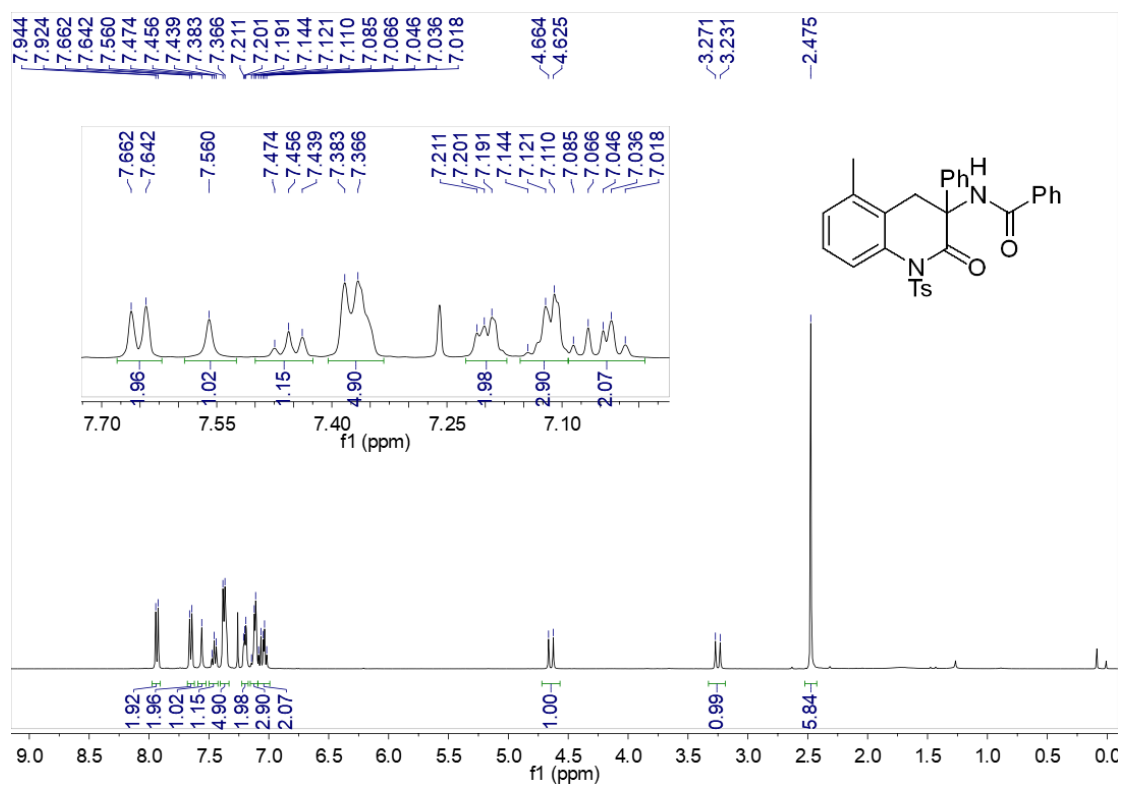

$^{13}\text{C}$  NMR (100 MHz,  $\text{CDCl}_3$ ) of compound **3fa**:

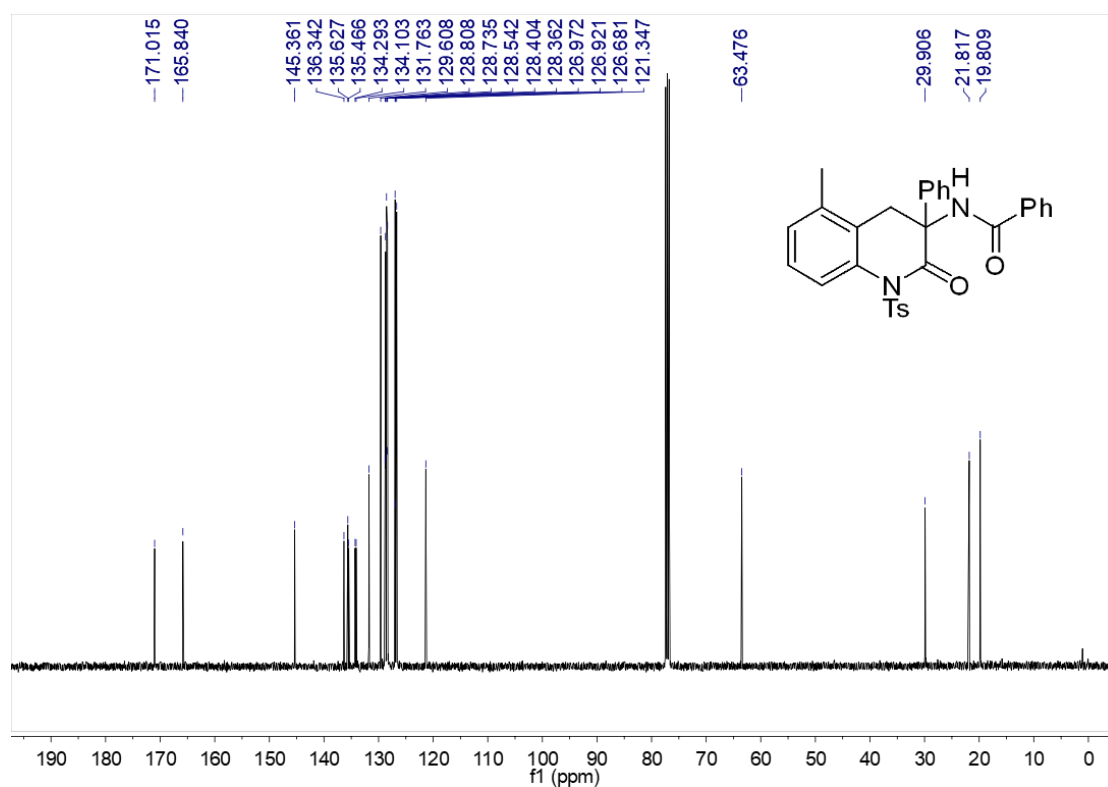

$^1\text{H}$  NMR (400 MHz,  $\text{CDCl}_3$ ) of compound **3ga**:

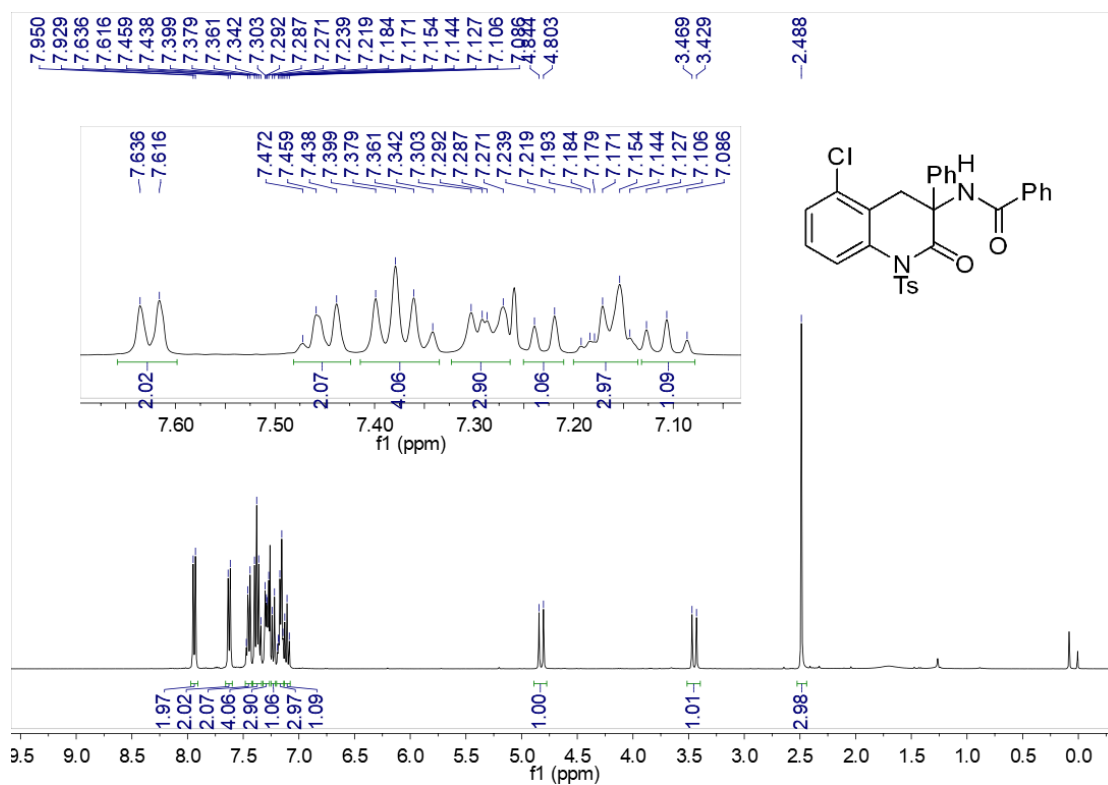

$^{13}\text{C}$  NMR (100 MHz,  $\text{CDCl}_3$ ) of compound **3ga**:

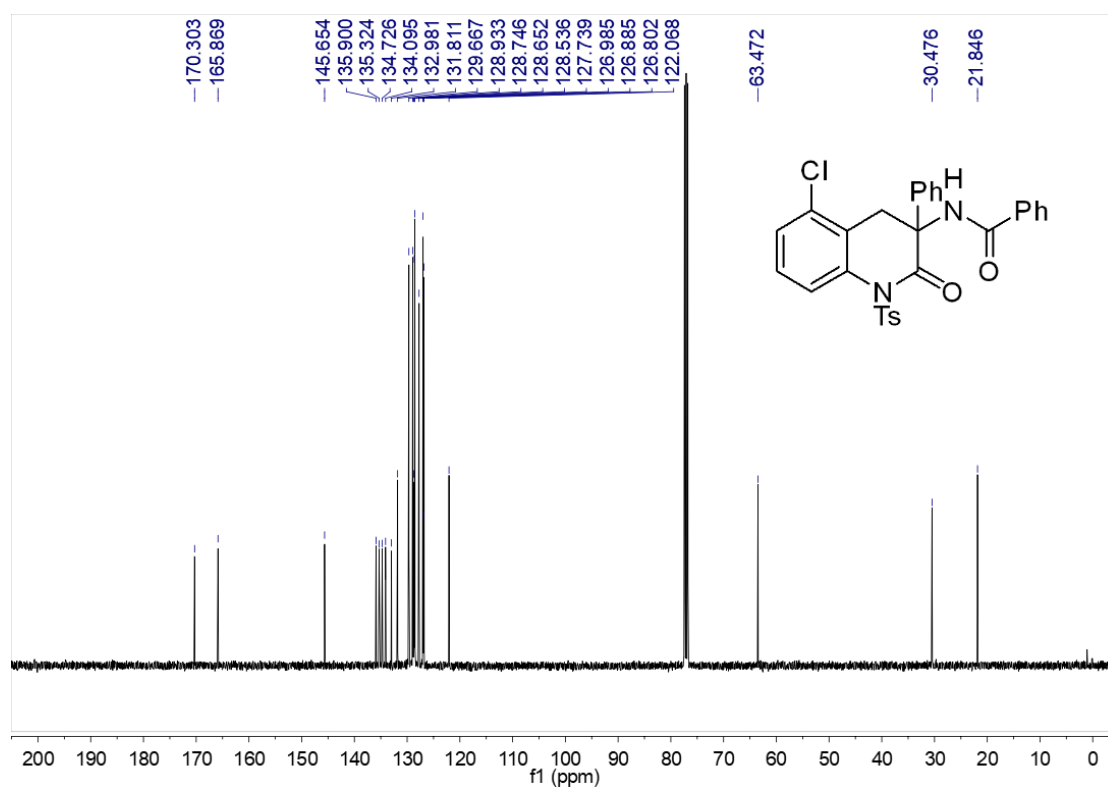



$^1\text{H}$  NMR (400 MHz,  $\text{CDCl}_3$ ) of compound **3ab**:

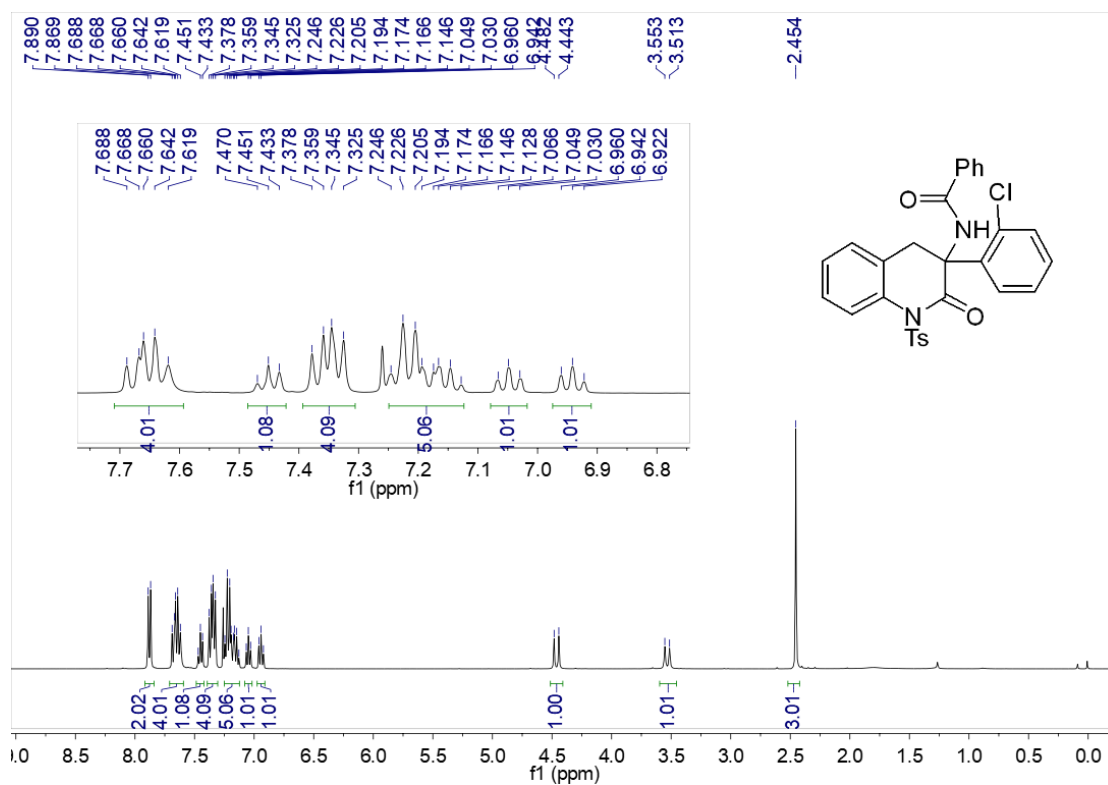

$^{13}\text{C}$  NMR (100 MHz,  $\text{CDCl}_3$ ) of compound **3ab**:

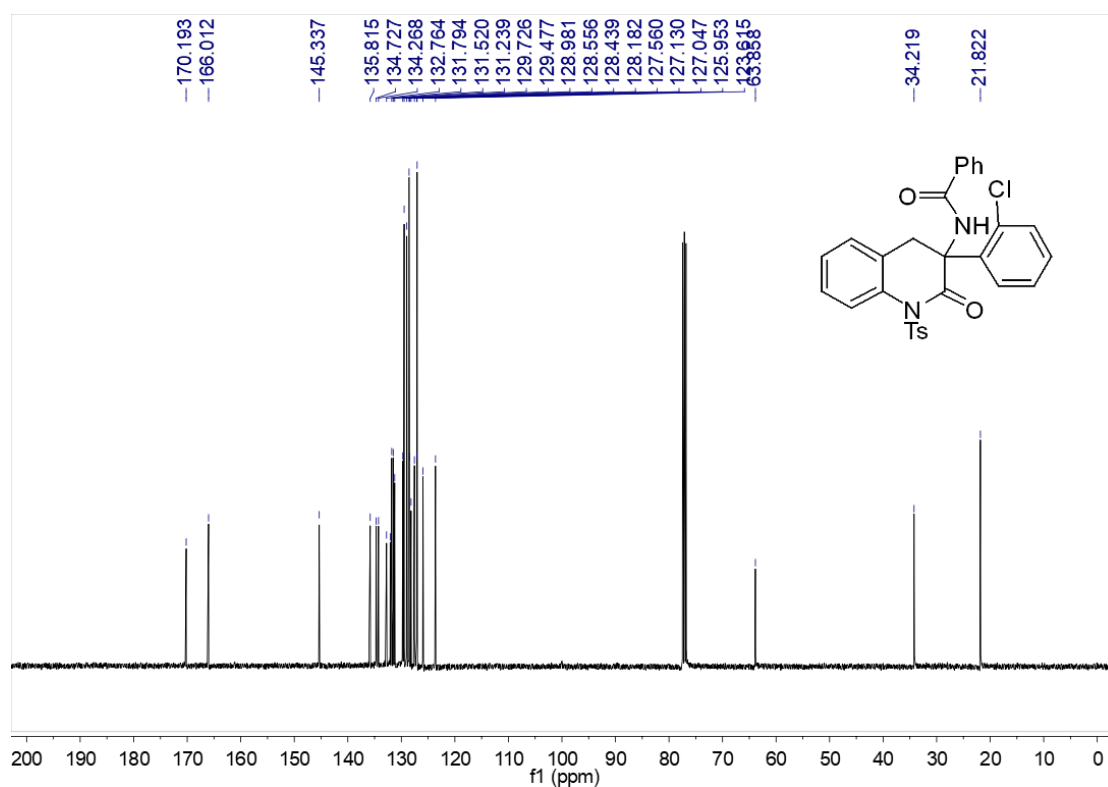

$^1\text{H}$  NMR (400 MHz,  $\text{CDCl}_3$ ) of compound **3ac**:

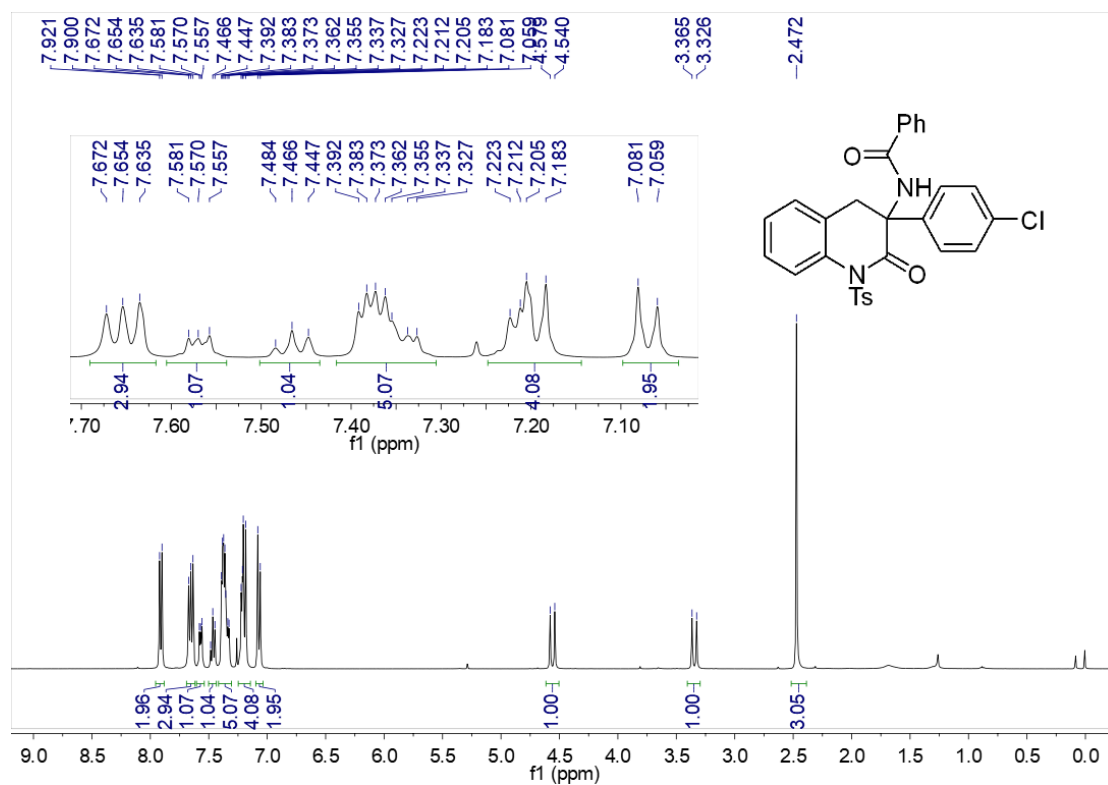

$^{13}\text{C}$  NMR (100 MHz,  $\text{CDCl}_3$ ) of compound **3ac**:

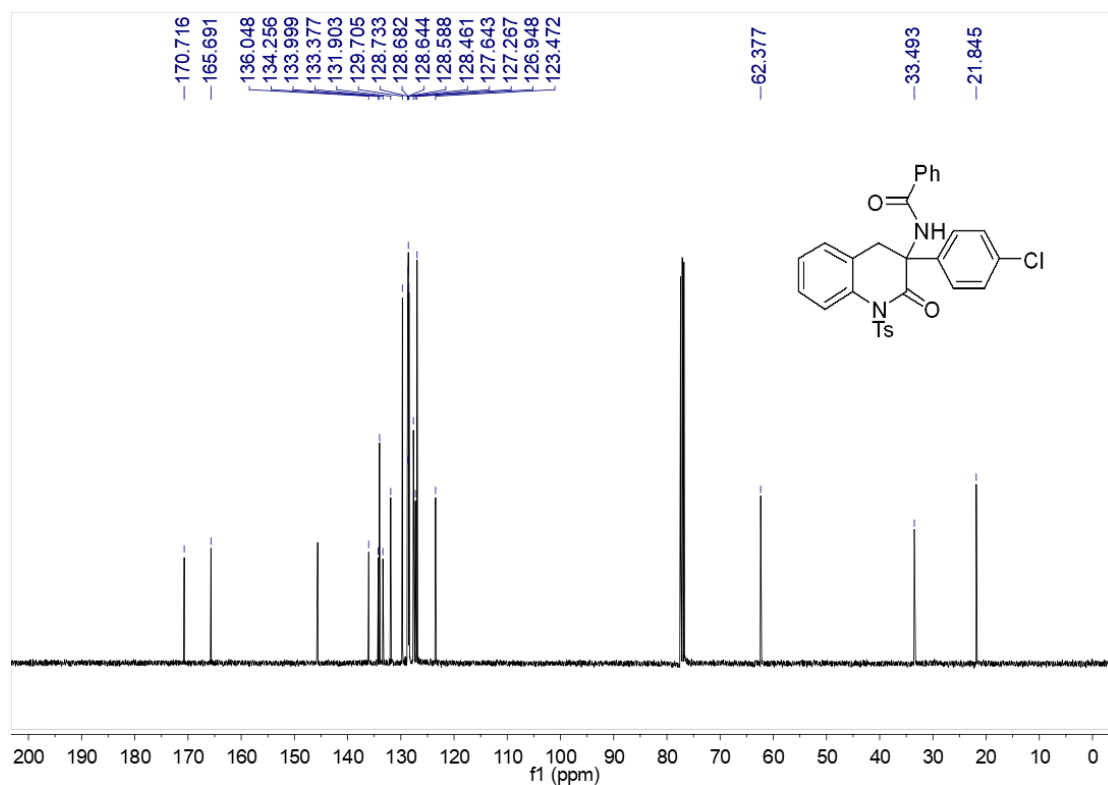

$^1\text{H}$  NMR (400 MHz,  $\text{CDCl}_3$ ) of compound **3ad**:

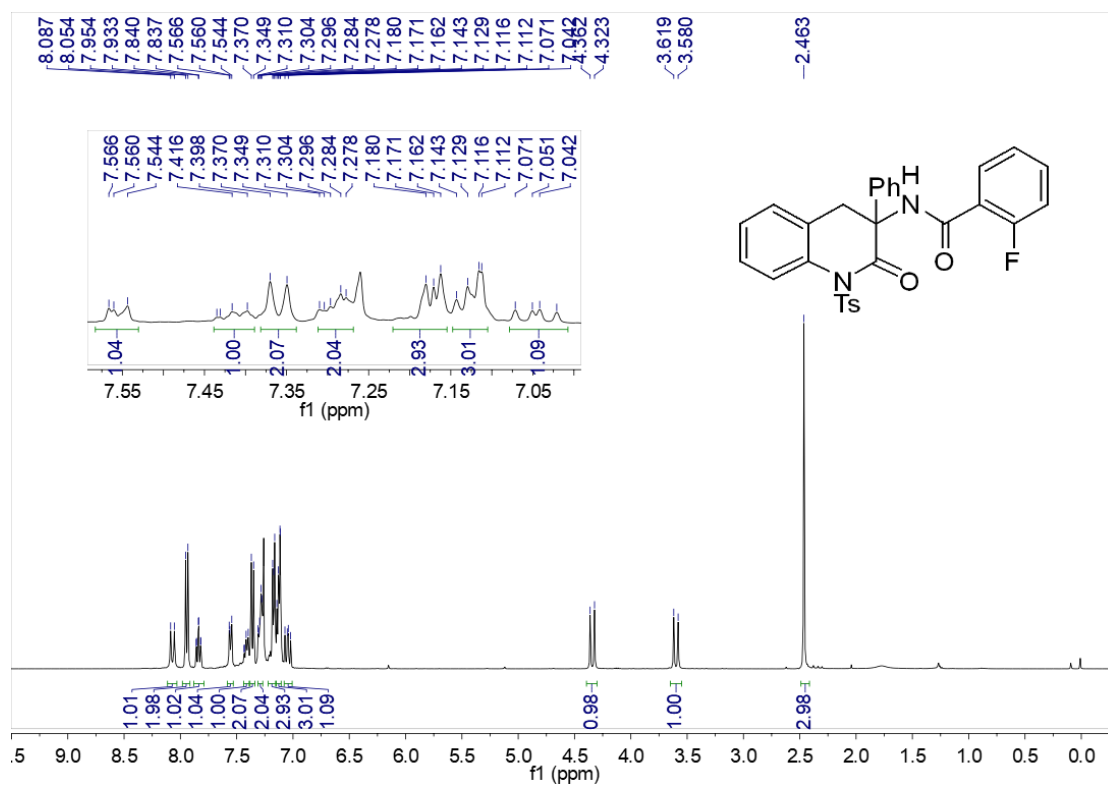

$^{13}\text{C}$  NMR (100 MHz,  $\text{CDCl}_3$ ) of compound **3ad**:

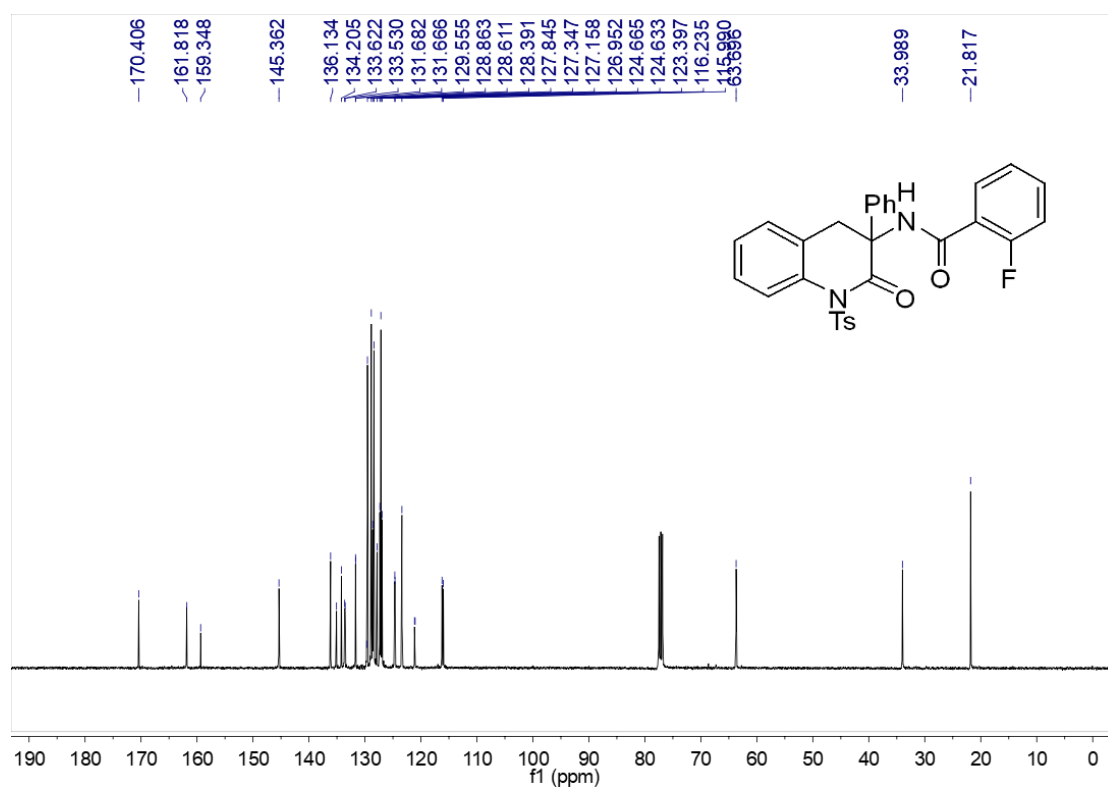

$^{19}\text{F}$  NMR (376 MHz,  $\text{CDCl}_3$ ) of compound **3ad**:

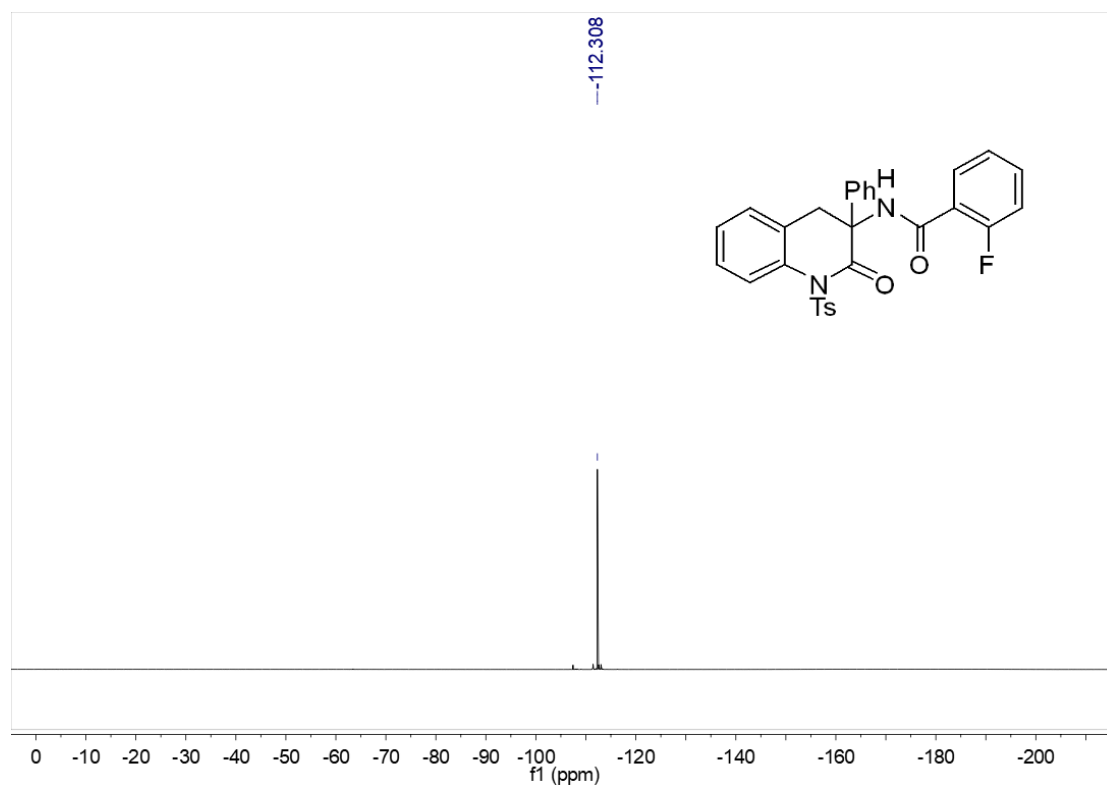

$^1\text{H}$  NMR (400 MHz,  $\text{CDCl}_3$ ) of compound **3ae**:

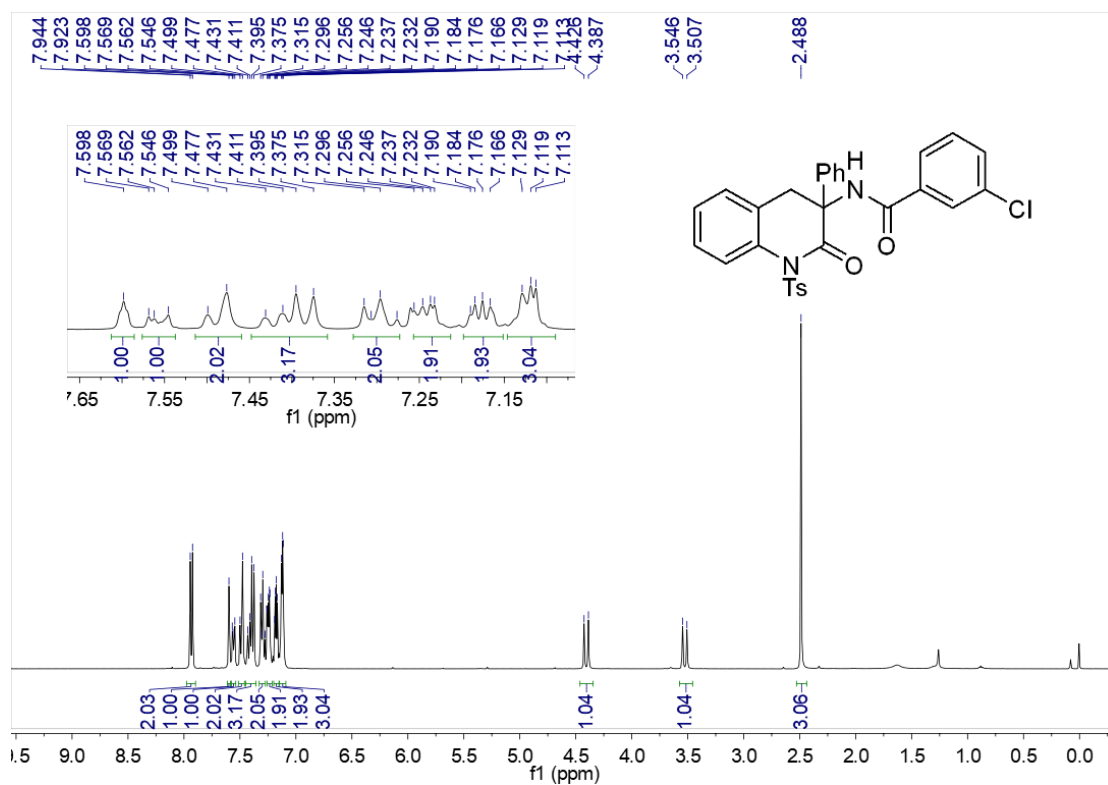

$^{13}\text{C}$  NMR (100 MHz,  $\text{CDCl}_3$ ) of compound **3ae**:

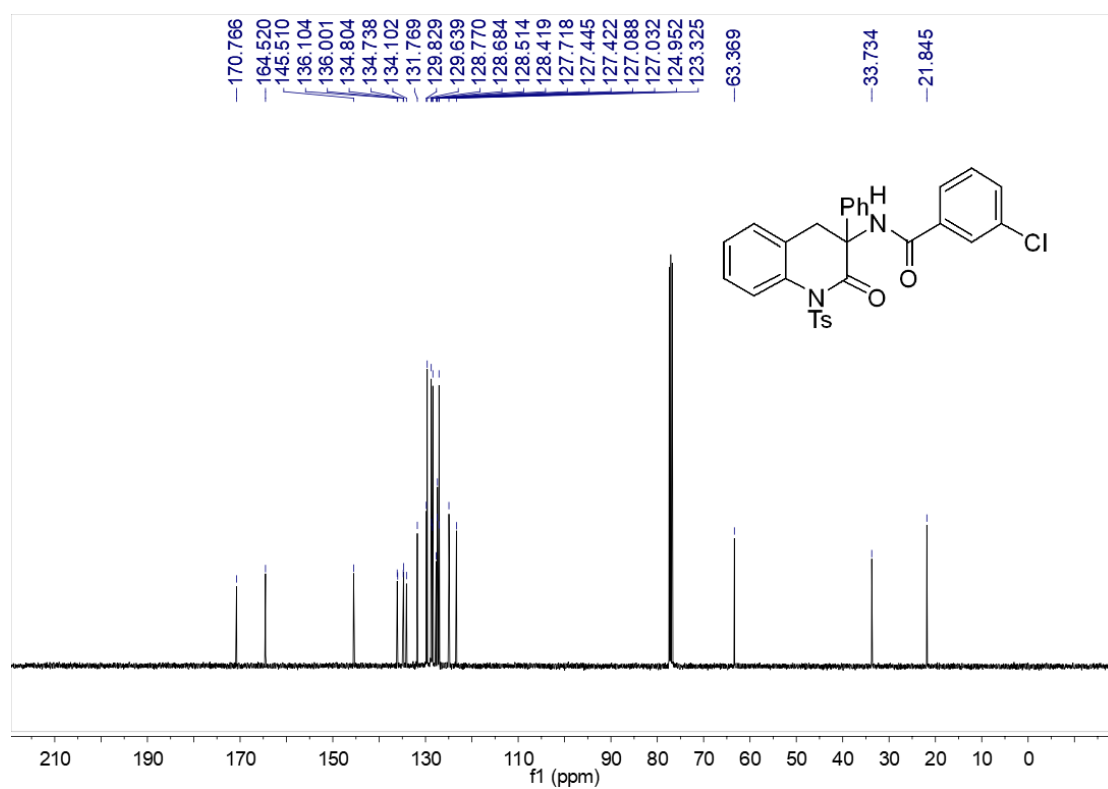

$^1\text{H}$  NMR (400 MHz,  $\text{CDCl}_3$ ) of compound **3af**:

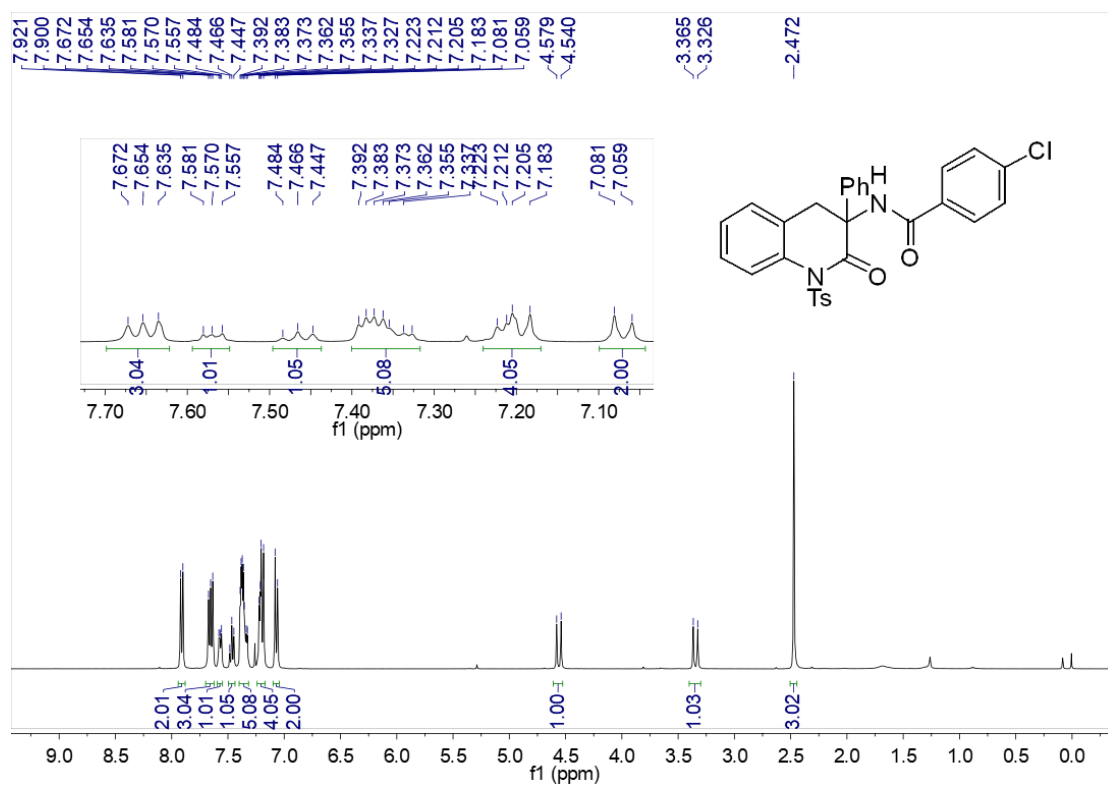

$^{13}\text{C}$  NMR (100 MHz,  $\text{CDCl}_3$ ) of compound **3af**:

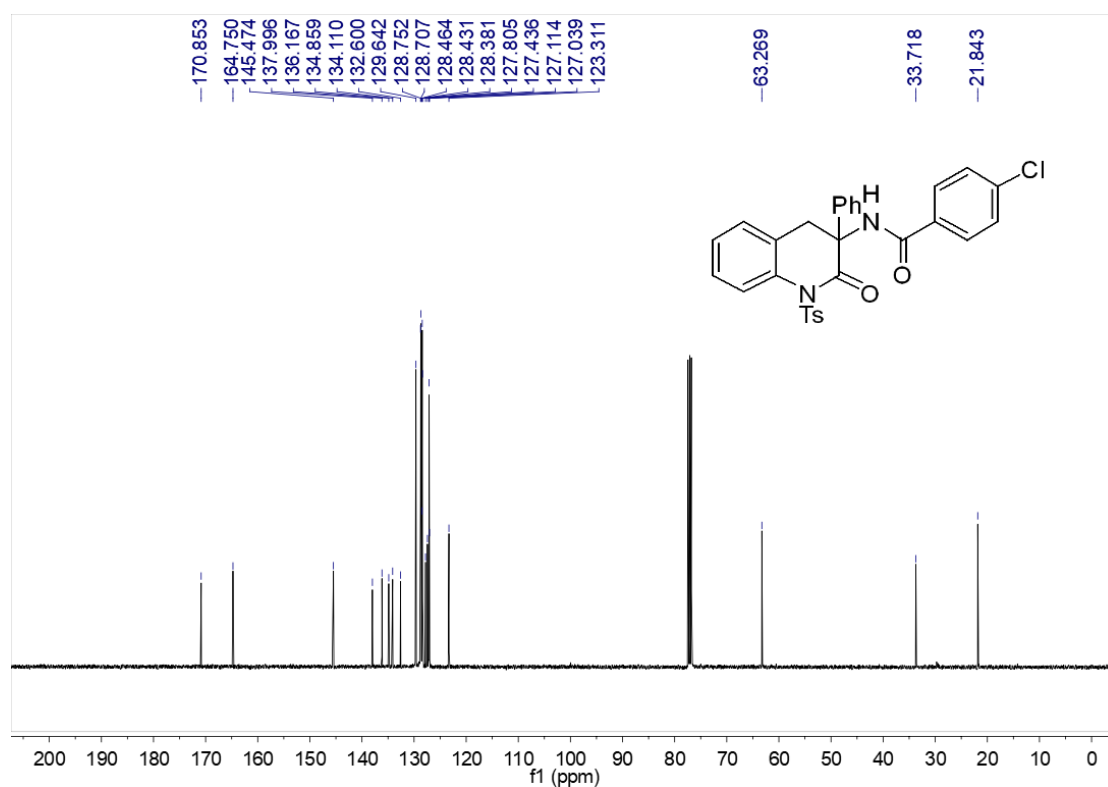

$^1\text{H}$  NMR (400 MHz,  $\text{CDCl}_3$ ) of compound **3ag**:

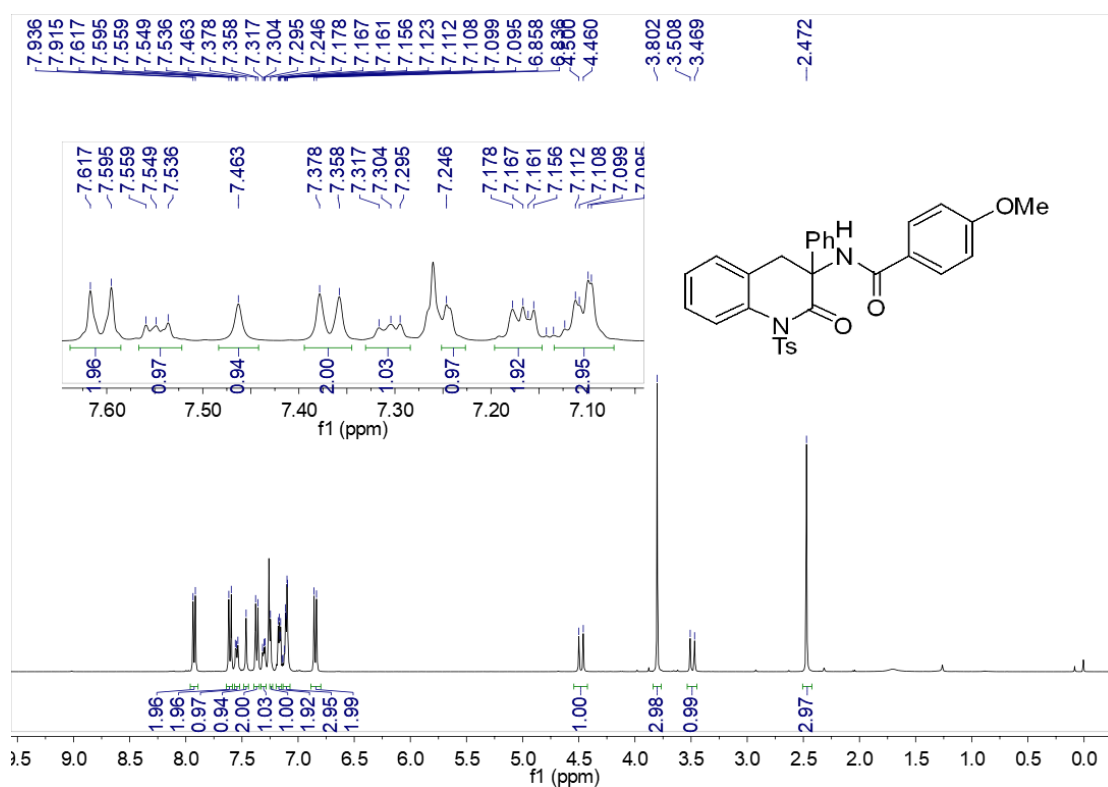

$^{13}\text{C}$  NMR (100 MHz,  $\text{CDCl}_3$ ) of compound **3ag**:

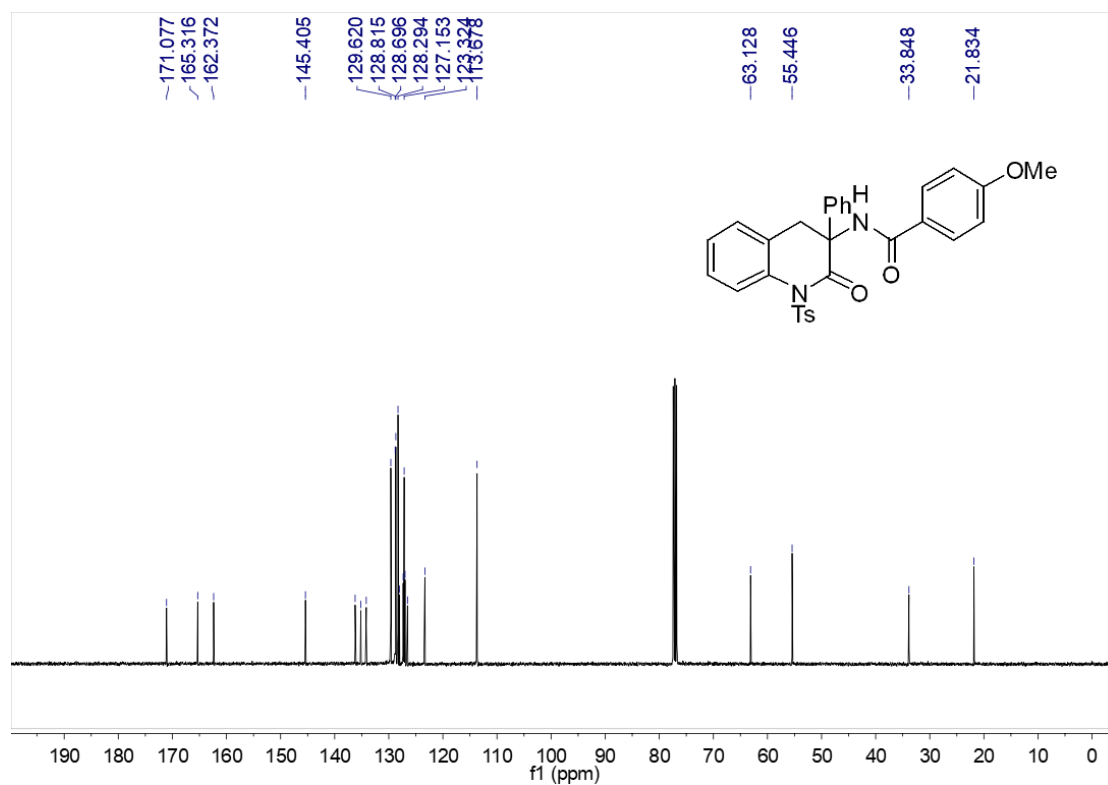

$^1\text{H}$  NMR (400 MHz,  $\text{CDCl}_3$ ) of compound **3ah**:

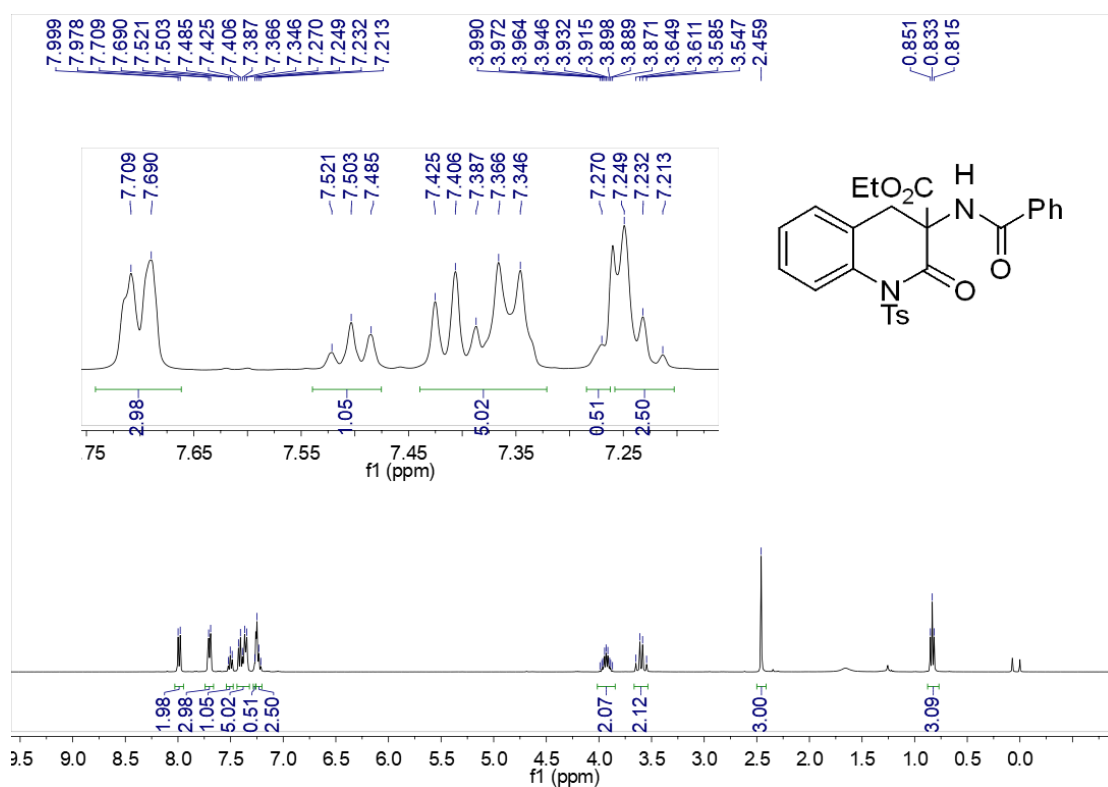

$^{13}\text{C}$  NMR (100 MHz,  $\text{CDCl}_3$ ) of compound **3ah**:

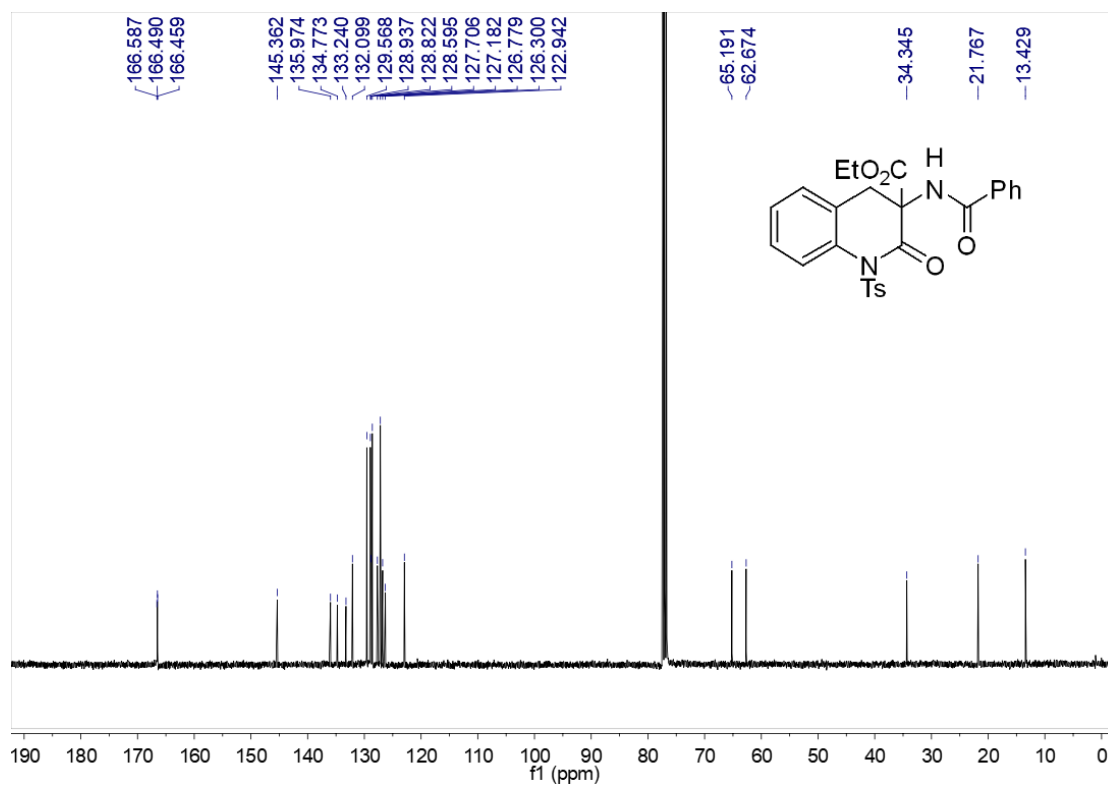



$^1\text{H}$  NMR (400 MHz,  $\text{CDCl}_3$ ) of compound **3ai**:

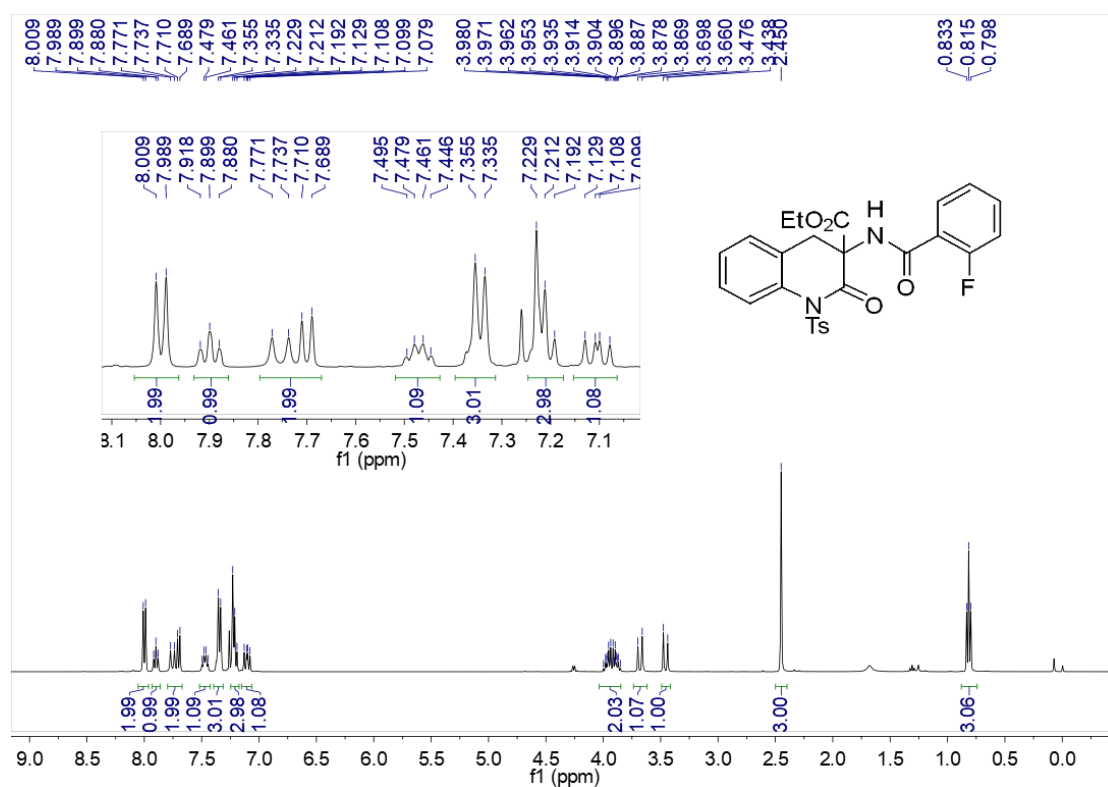

$^{13}\text{C}$  NMR (100 MHz,  $\text{CDCl}_3$ ) of compound **3ai**:

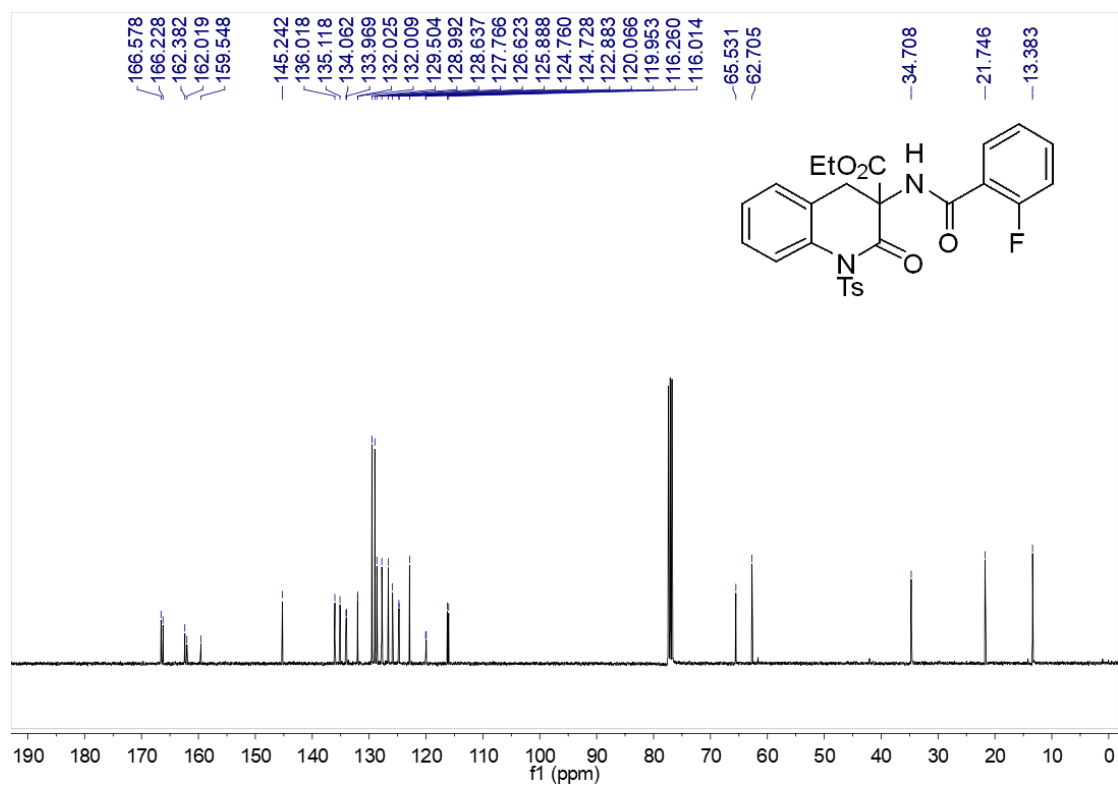

$^{19}\text{F}$  NMR (376 MHz,  $\text{CDCl}_3$ ) of compound **3ai**:

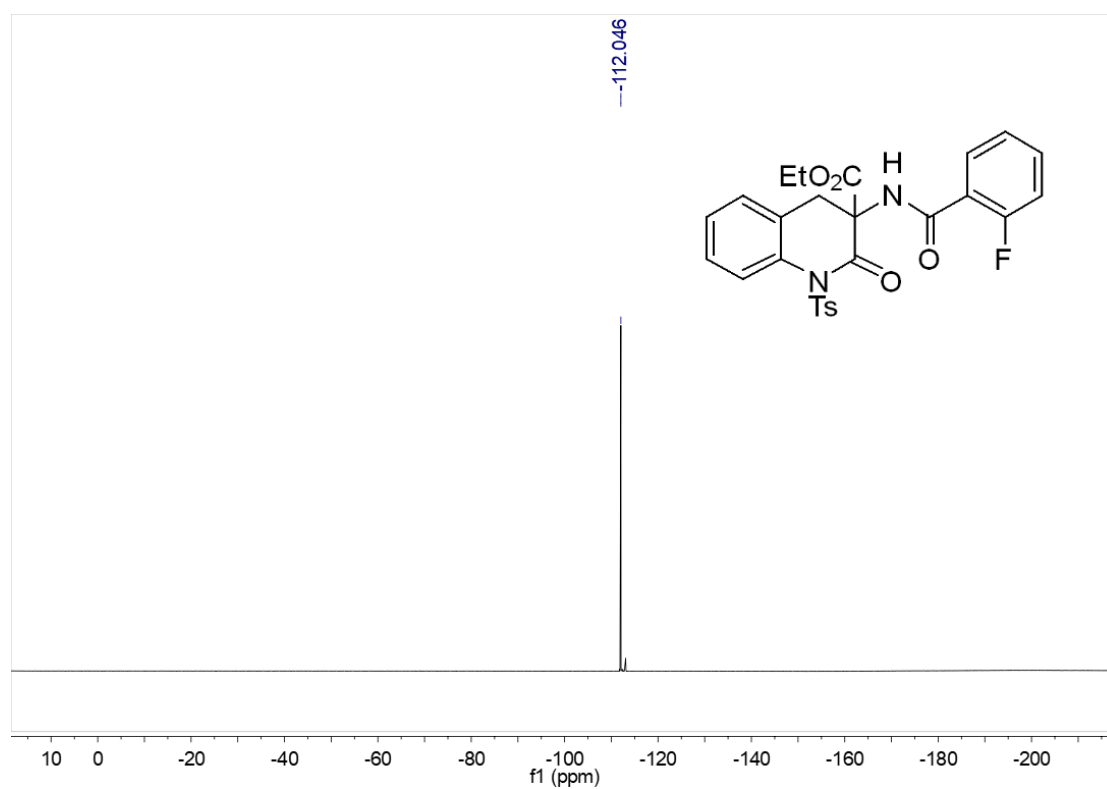

$^1\text{H}$  NMR (400 MHz,  $\text{CDCl}_3$ ) of compound **3aj**:

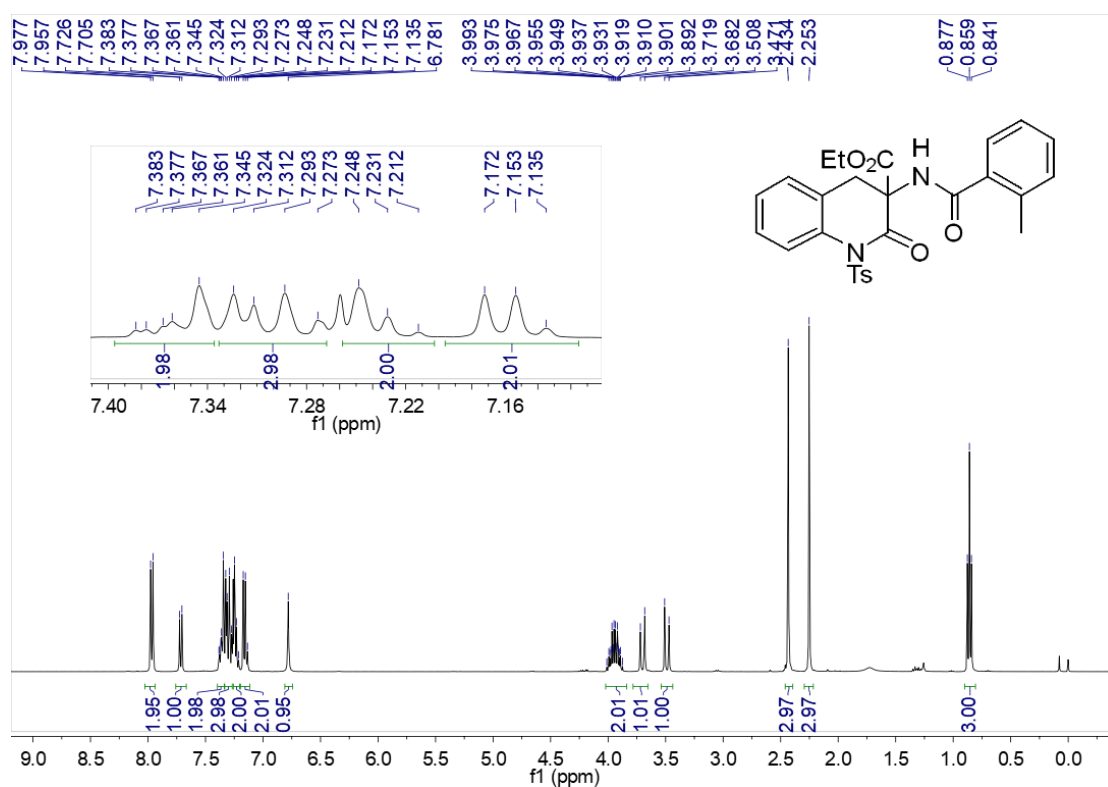

$^{13}\text{C}$  NMR (100 MHz,  $\text{CDCl}_3$ ) of compound **3aj**:

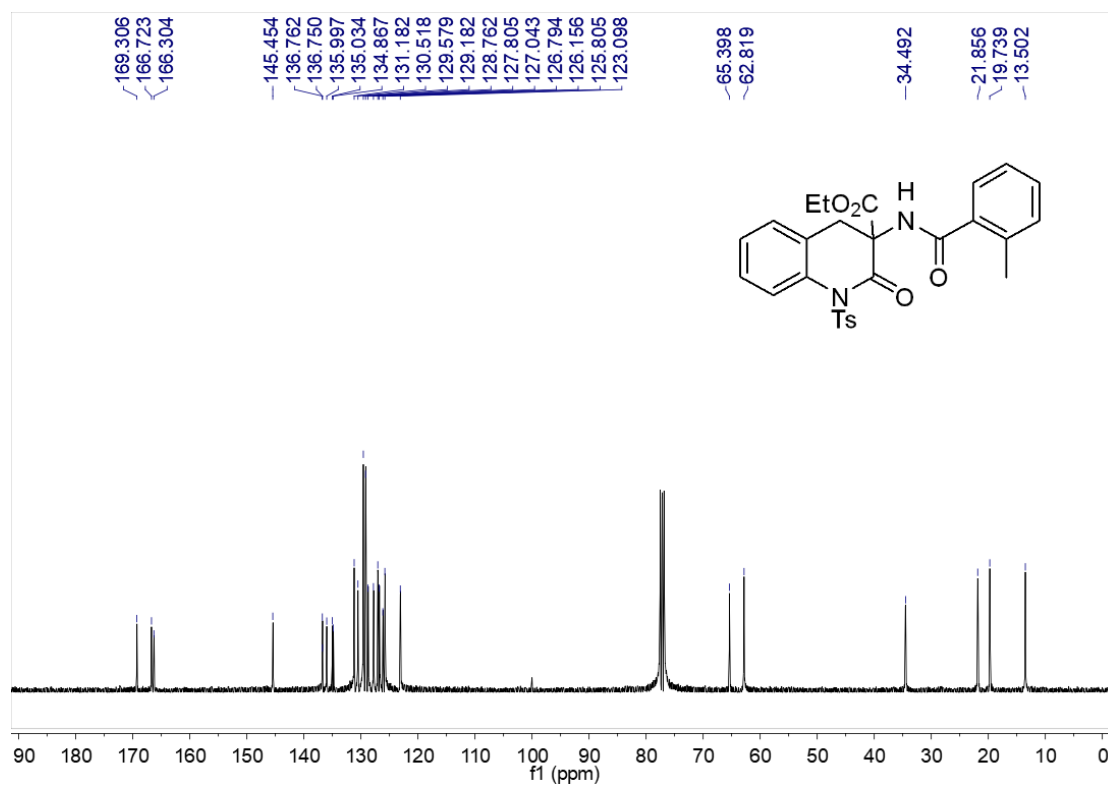

$^1\text{H}$  NMR (400 MHz,  $\text{CDCl}_3$ ) of compound **3ak**:

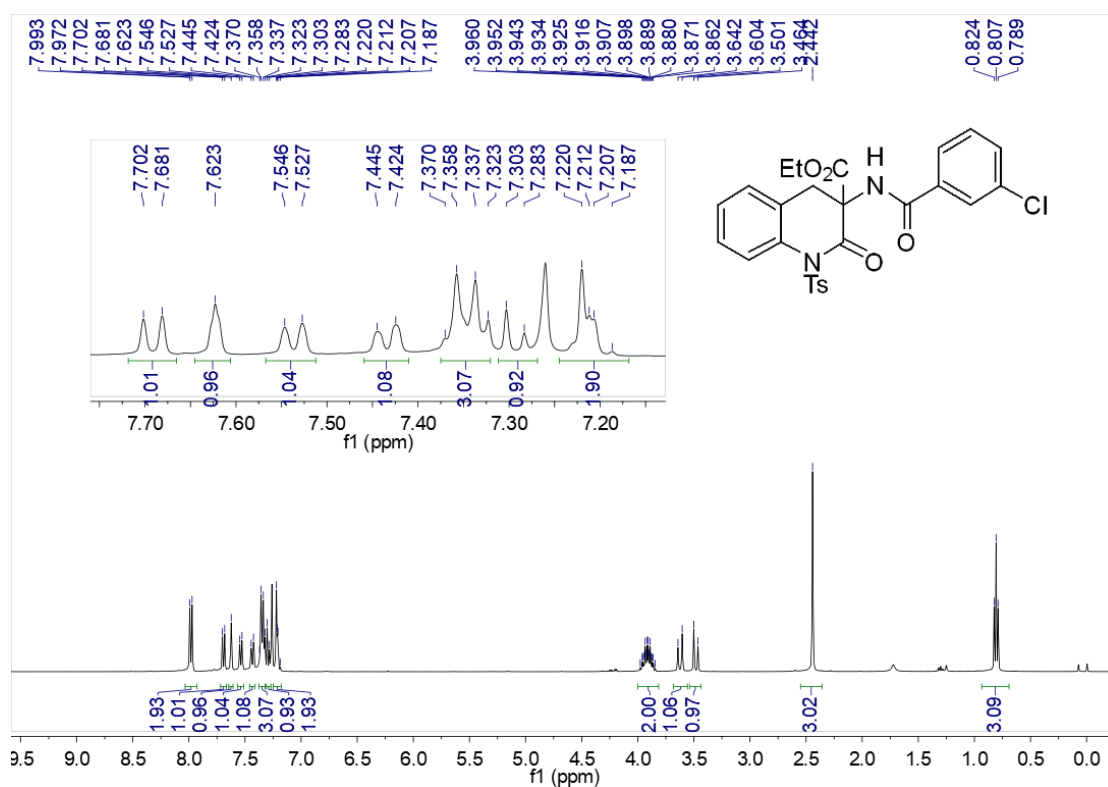

$^{13}\text{C}$  NMR (100 MHz,  $\text{CDCl}_3$ ) of compound **3ak**:

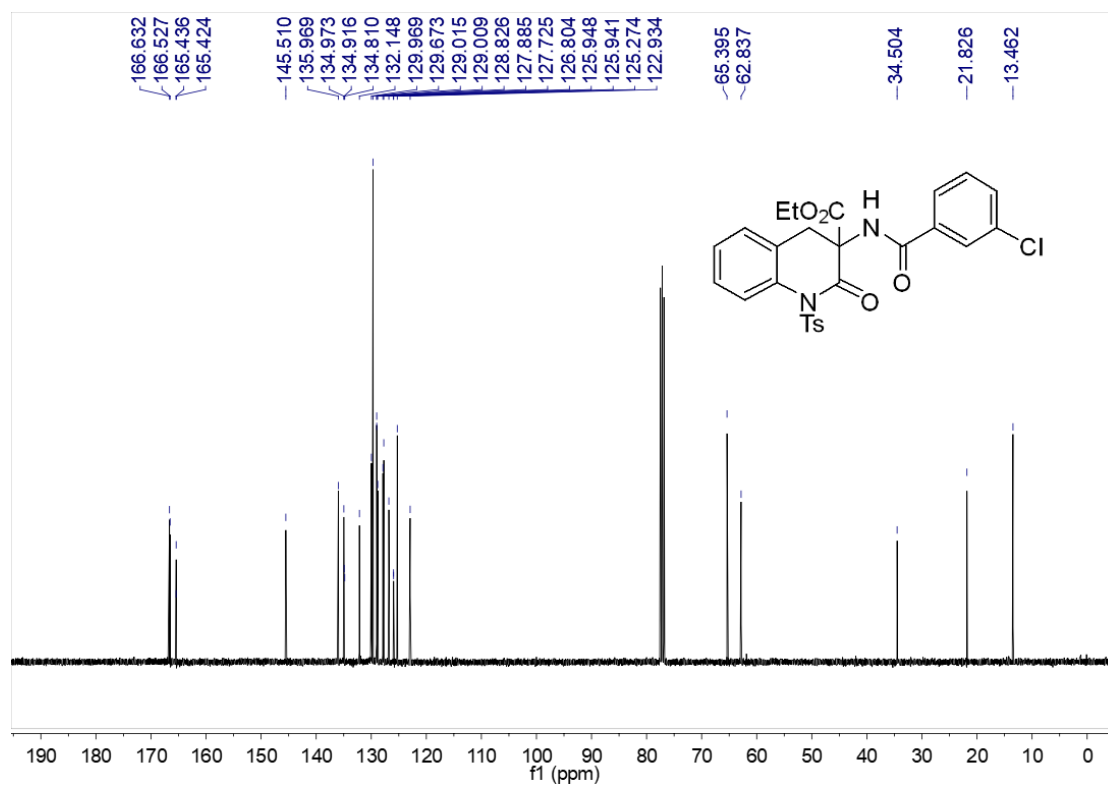

$^1\text{H}$  NMR (400 MHz,  $\text{CDCl}_3$ ) of compound **3al**:

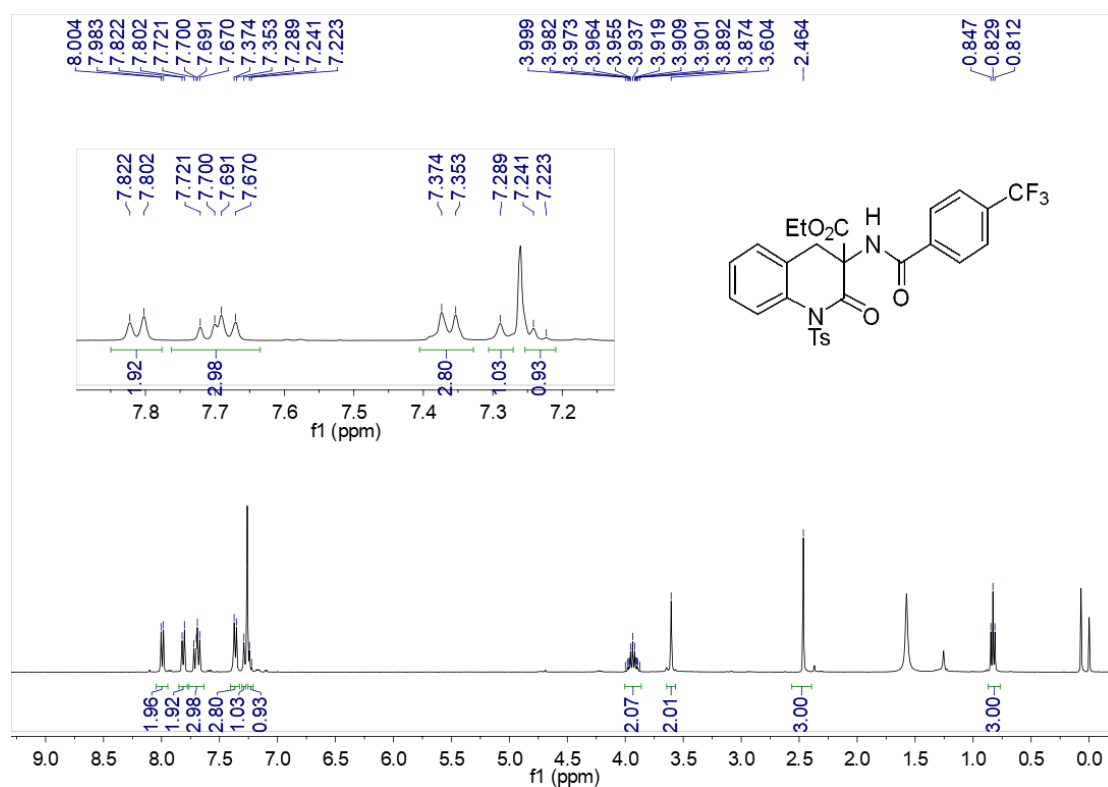

$^{13}\text{C}$  NMR (100 MHz,  $\text{CDCl}_3$ ) of compound **3al**:

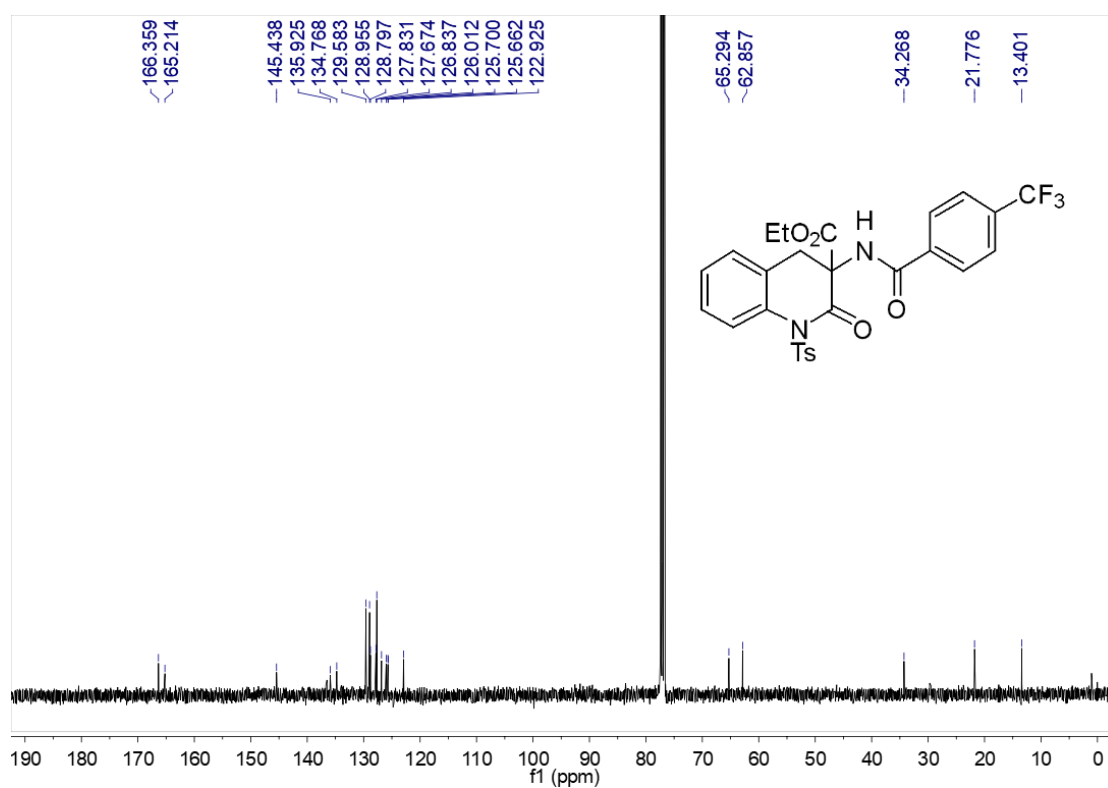

$^{19}\text{F}$  NMR (376 MHz,  $\text{CDCl}_3$ ) of compound **3al**:

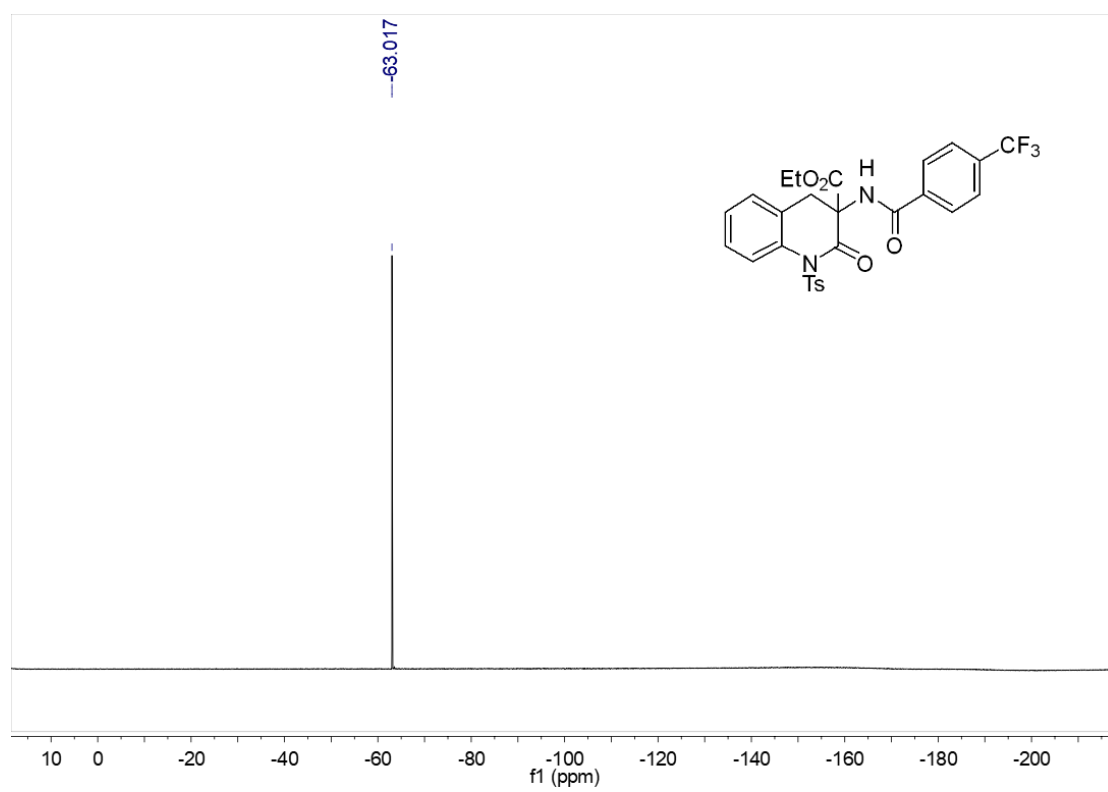

$^1\text{H}$  NMR (400 MHz,  $\text{CDCl}_3$ ) of compound **3am**:

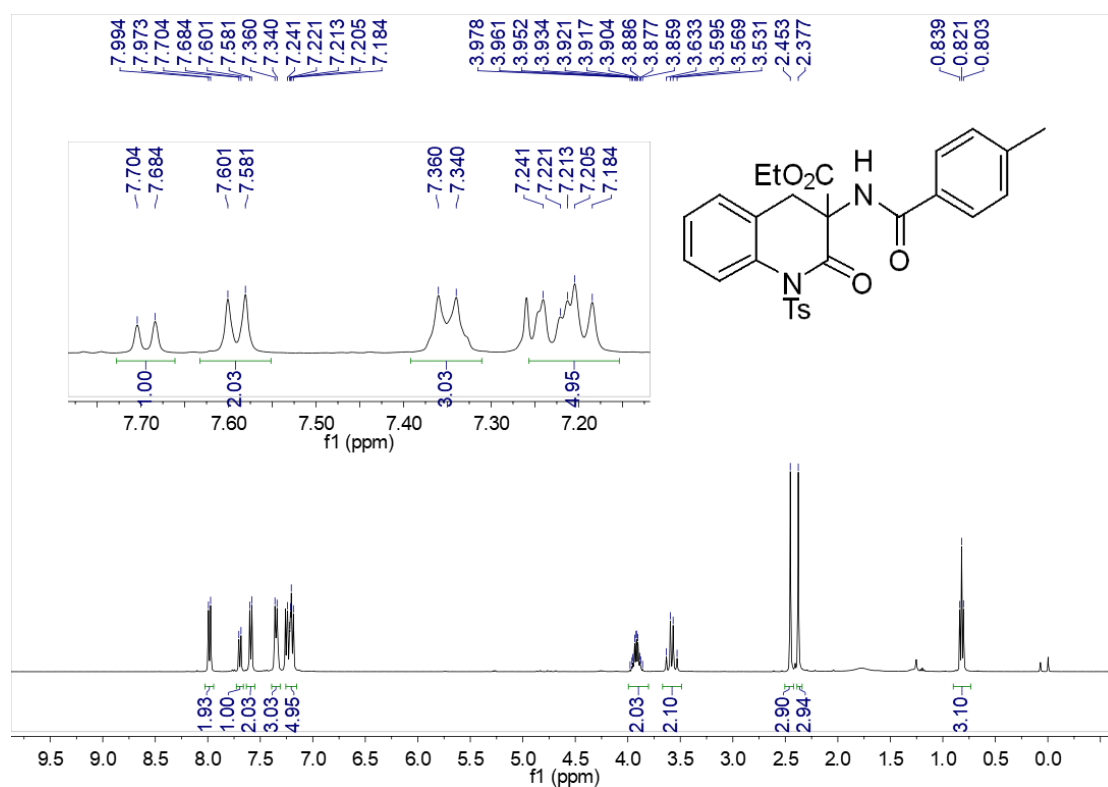

$^{13}\text{C}$  NMR (100 MHz,  $\text{CDCl}_3$ ) of compound **3am**:

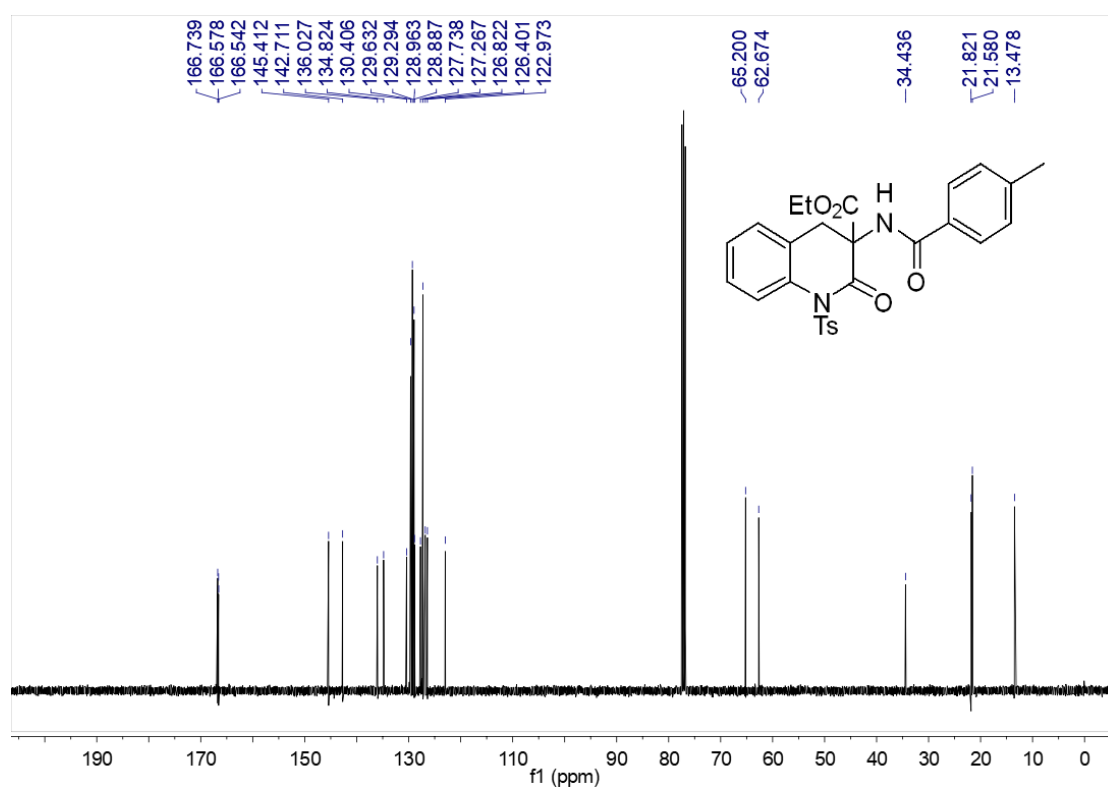

$^1\text{H}$  NMR (400 MHz,  $\text{CDCl}_3$ ) of compound **3an**:

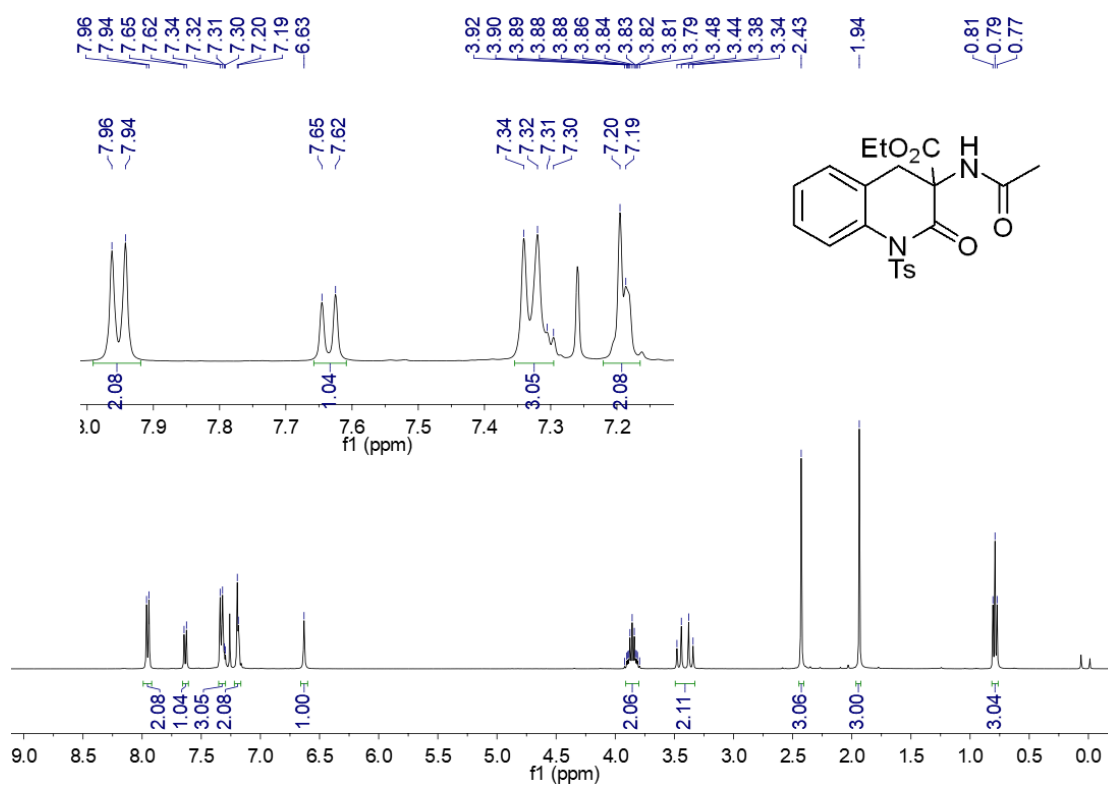

$^{13}\text{C}$  NMR (100 MHz,  $\text{CDCl}_3$ ) of compound **3an**:

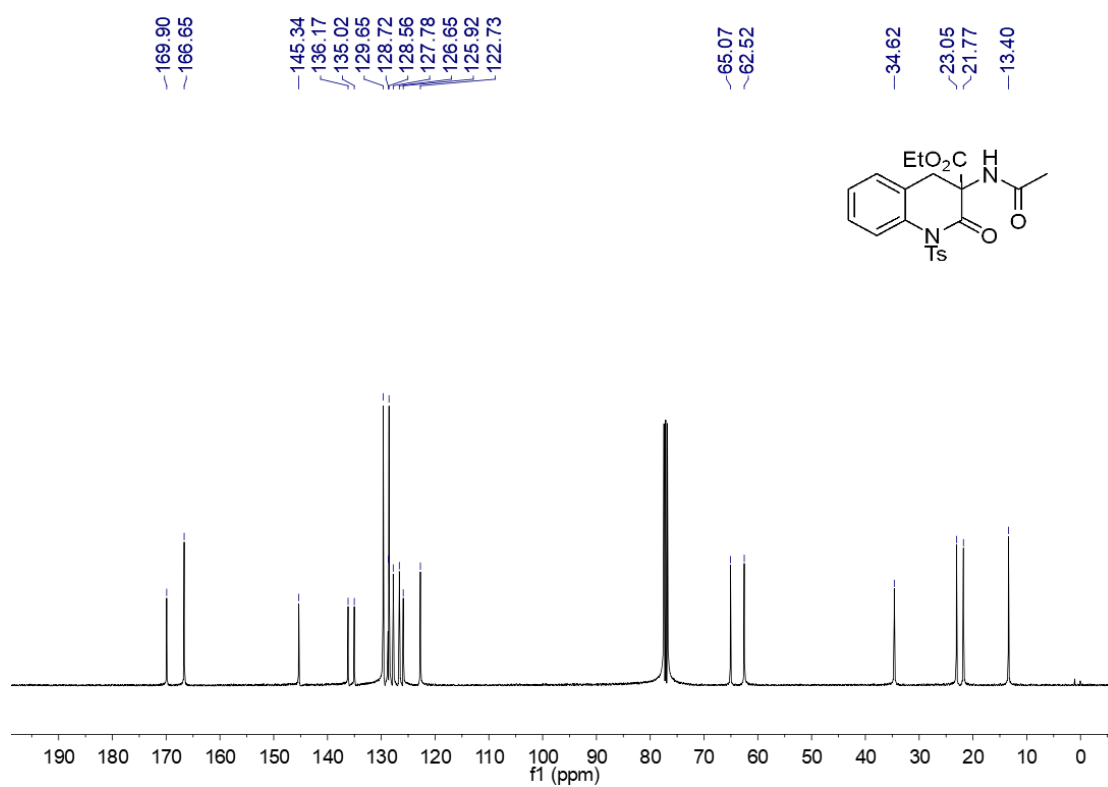



$^1\text{H}$  NMR (400 MHz,  $\text{CDCl}_3$ ) of compound **3hn**:

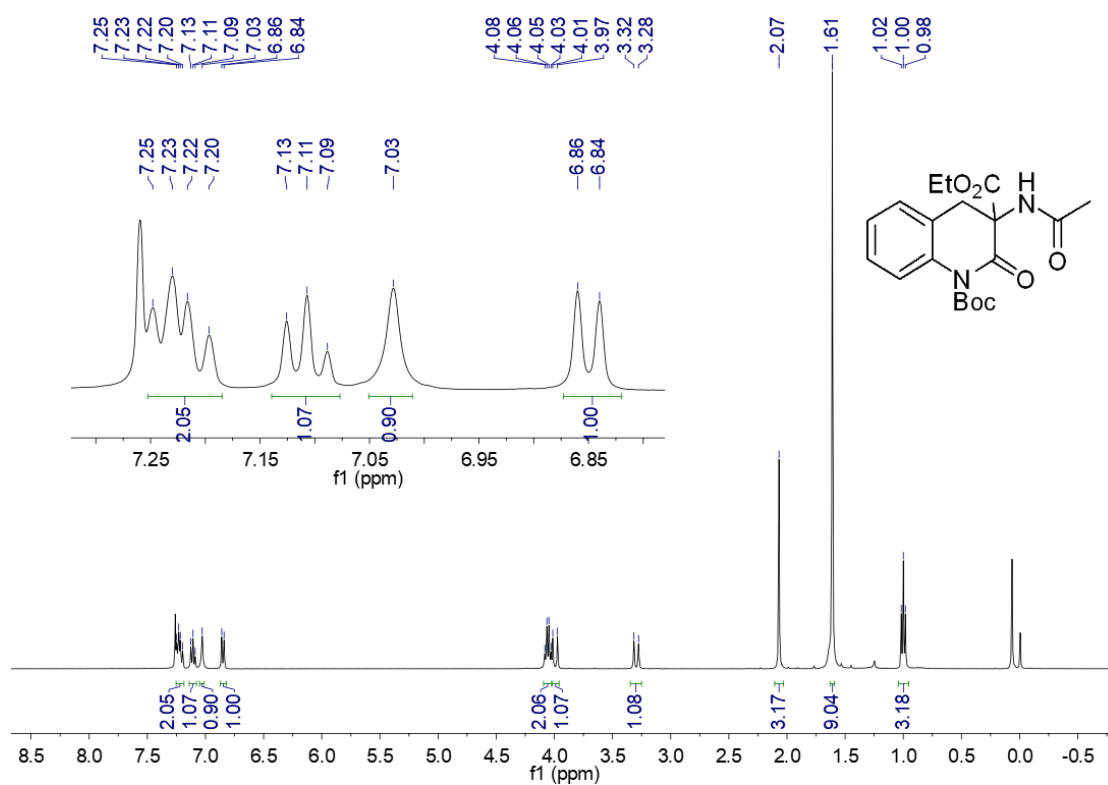

$^{13}\text{C}$  NMR (100 MHz,  $\text{CDCl}_3$ ) of compound **3hn**:

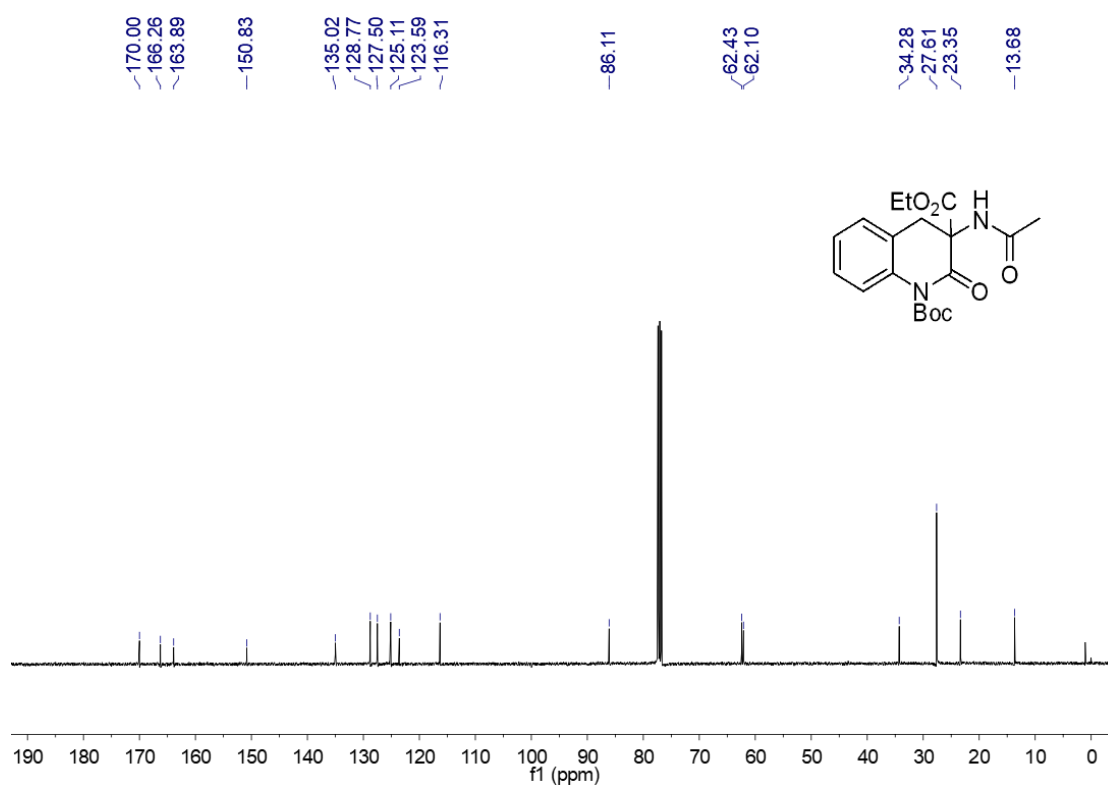

$^1\text{H}$  NMR (400 MHz,  $\text{CDCl}_3$ ) of compound **3ao**:

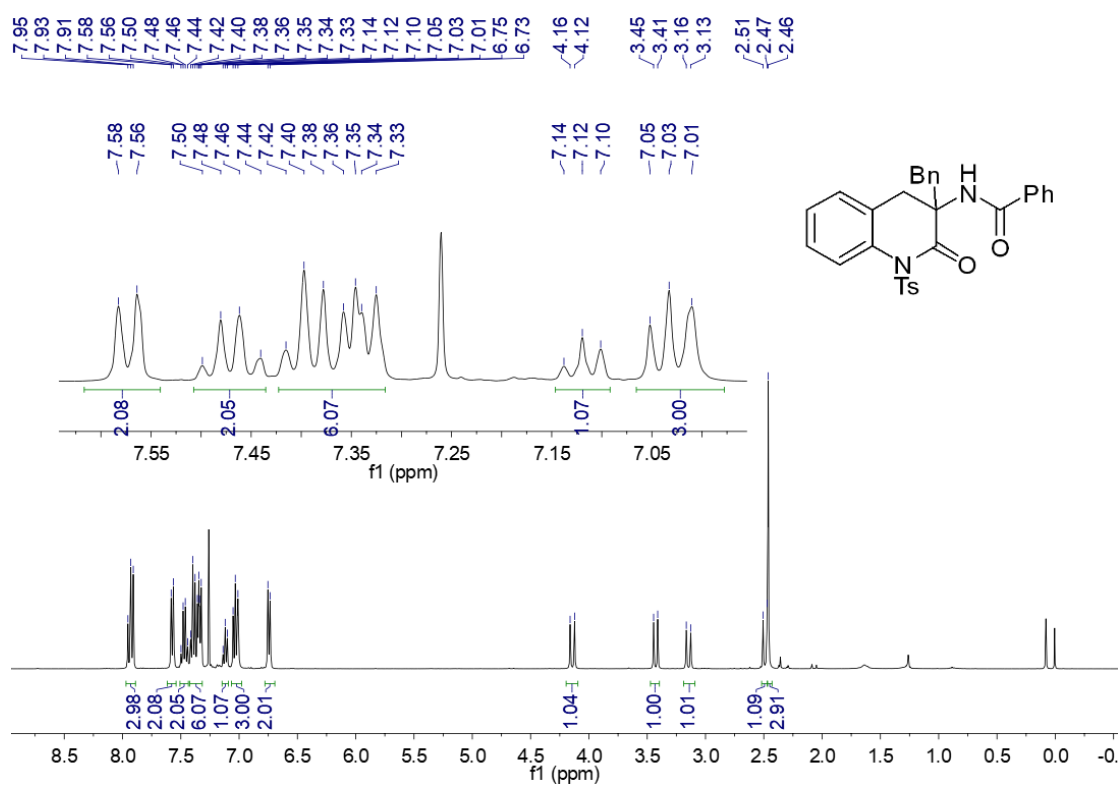

$^{13}\text{C}$  NMR (100 MHz,  $\text{CDCl}_3$ ) of compound **3ao**:

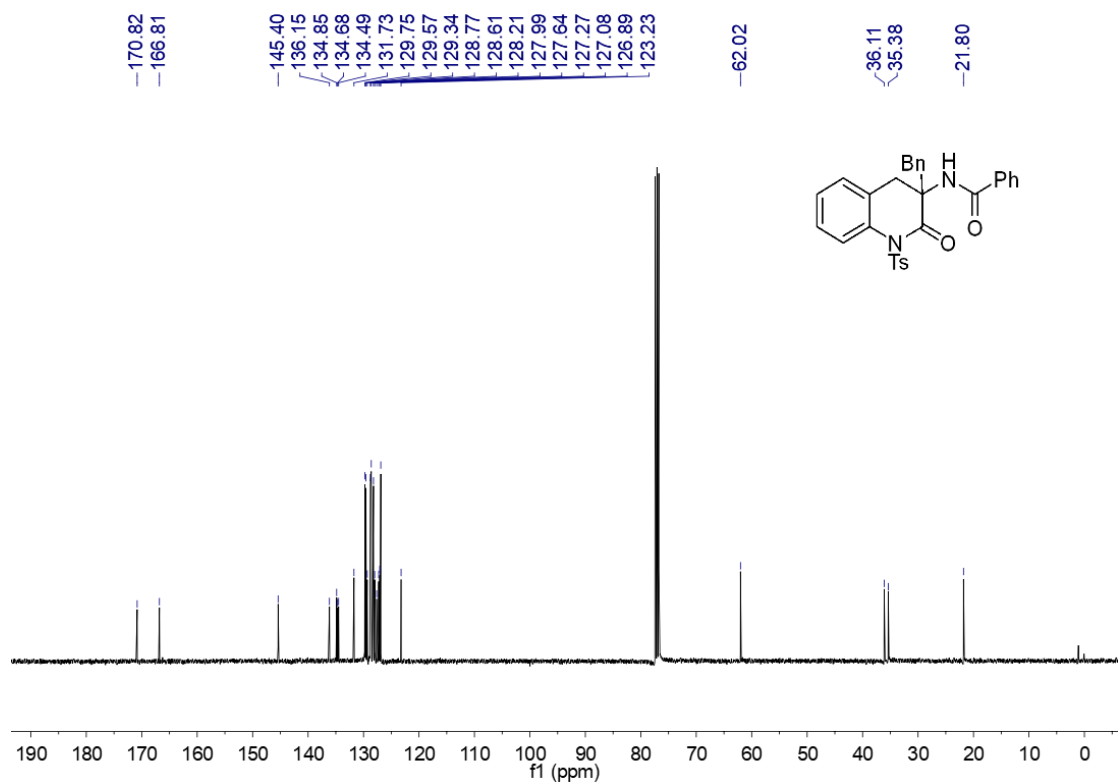

$^1\text{H}$  NMR (400 MHz,  $\text{CDCl}_3$ ) of compound **3ho**:

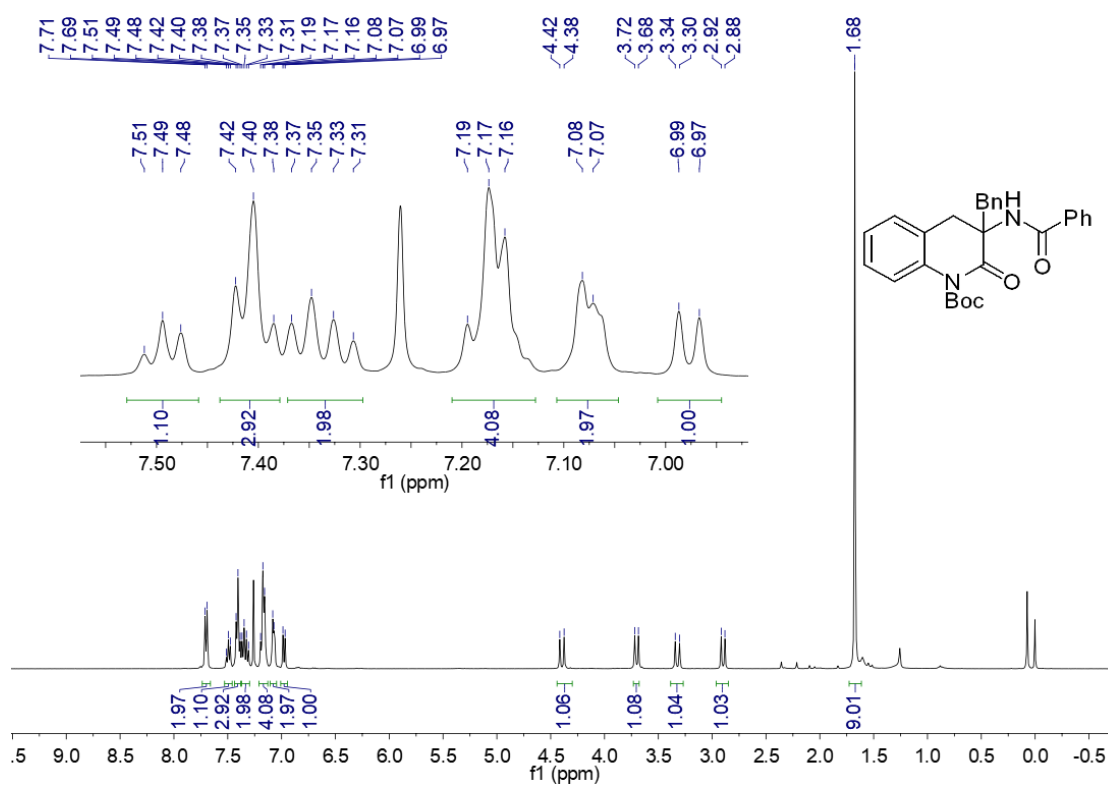

$^{13}\text{C}$  NMR (100 MHz,  $\text{CDCl}_3$ ) of compound **3ho**:

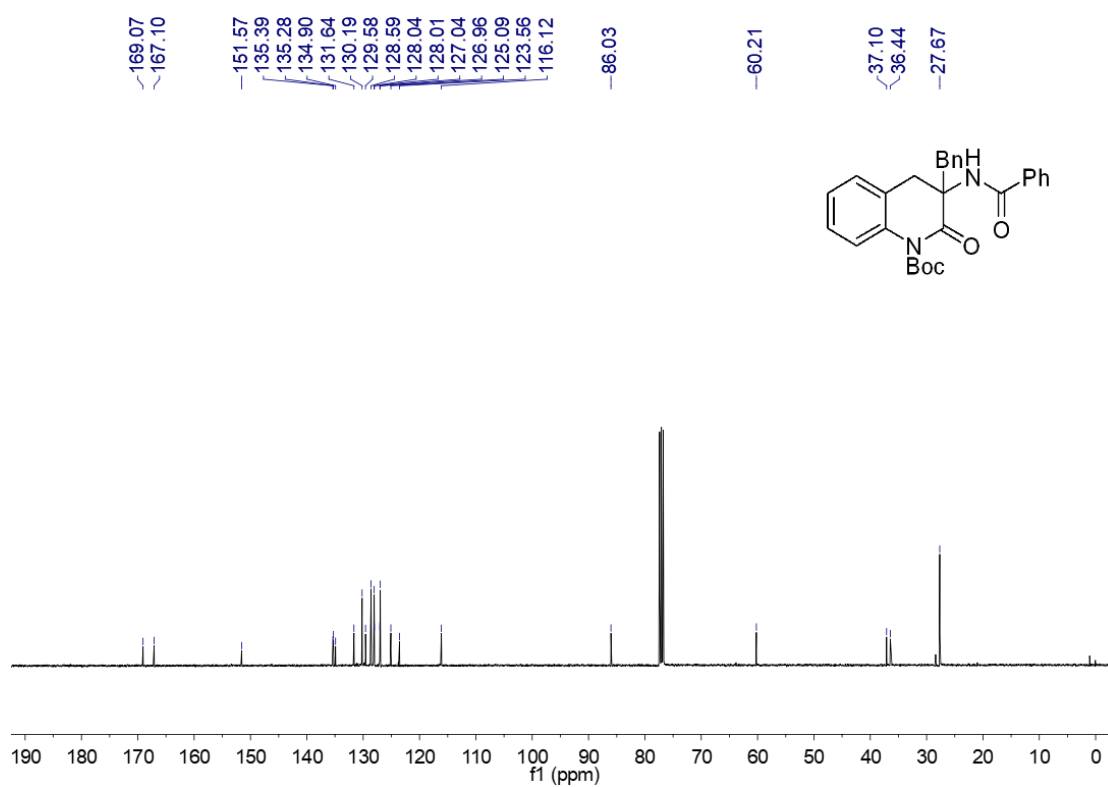

$^1\text{H}$  NMR (400 MHz,  $\text{CDCl}_3$ ) of compound **3hp**:

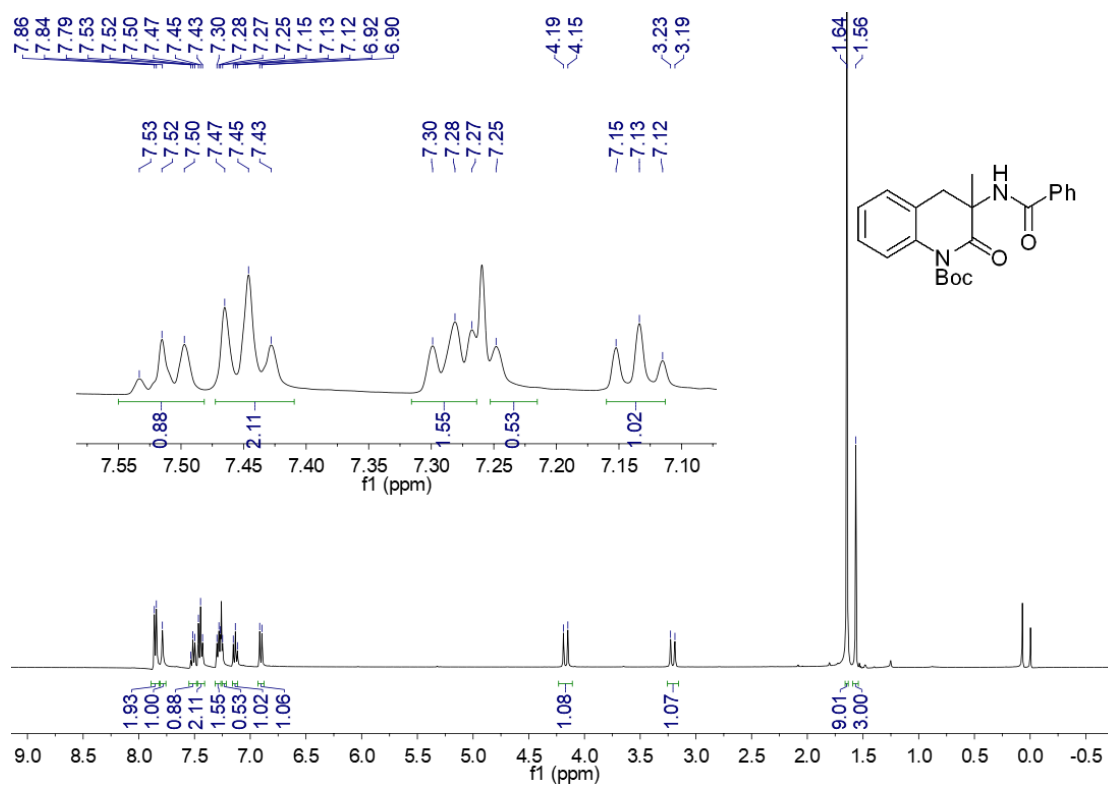

$^{13}\text{C}$  NMR (100 MHz,  $\text{CDCl}_3$ ) of compound **3hp**:

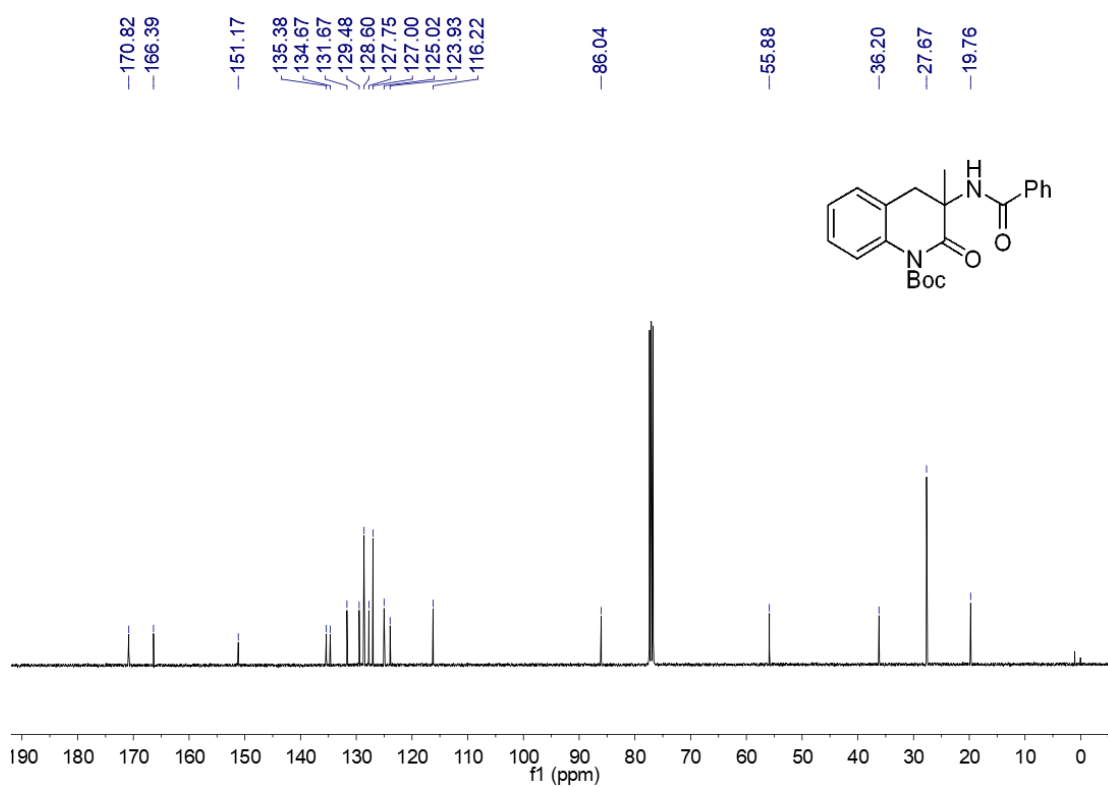

$^1\text{H}$  NMR (400 MHz,  $\text{CDCl}_3$ ) of compound **3hq**:

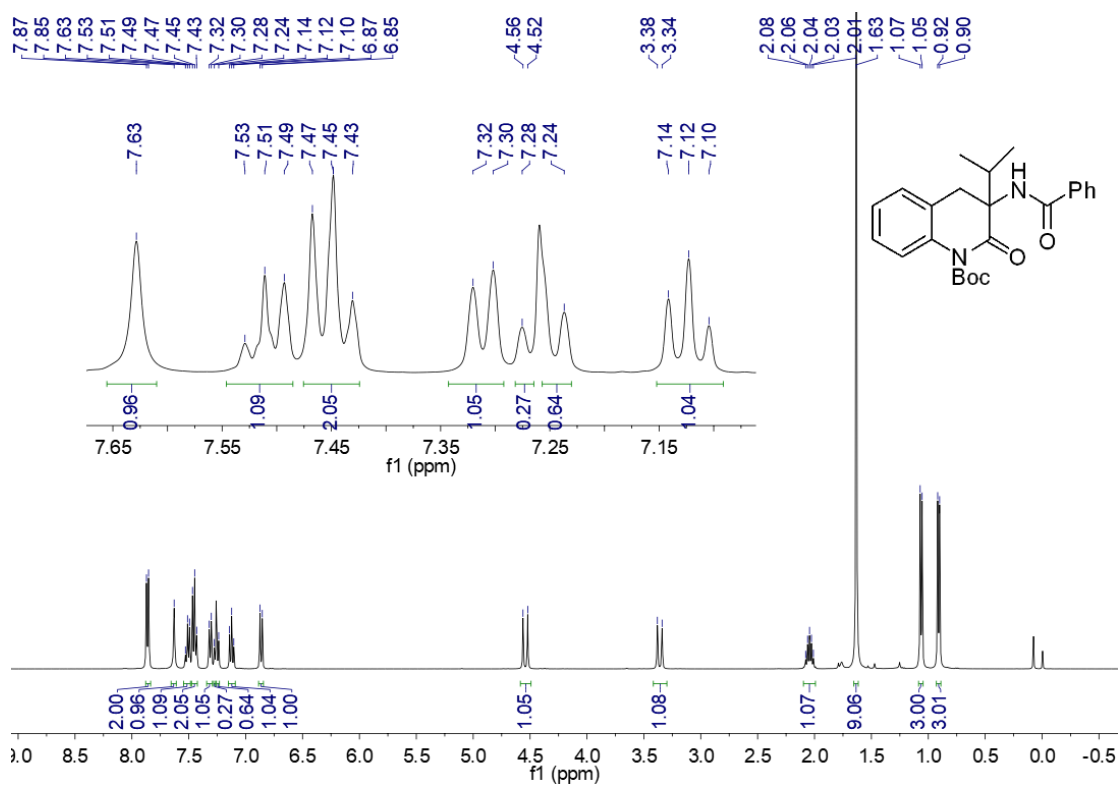

$^{13}\text{C}$  NMR (100 MHz,  $\text{CDCl}_3$ ) of compound **3hq**:

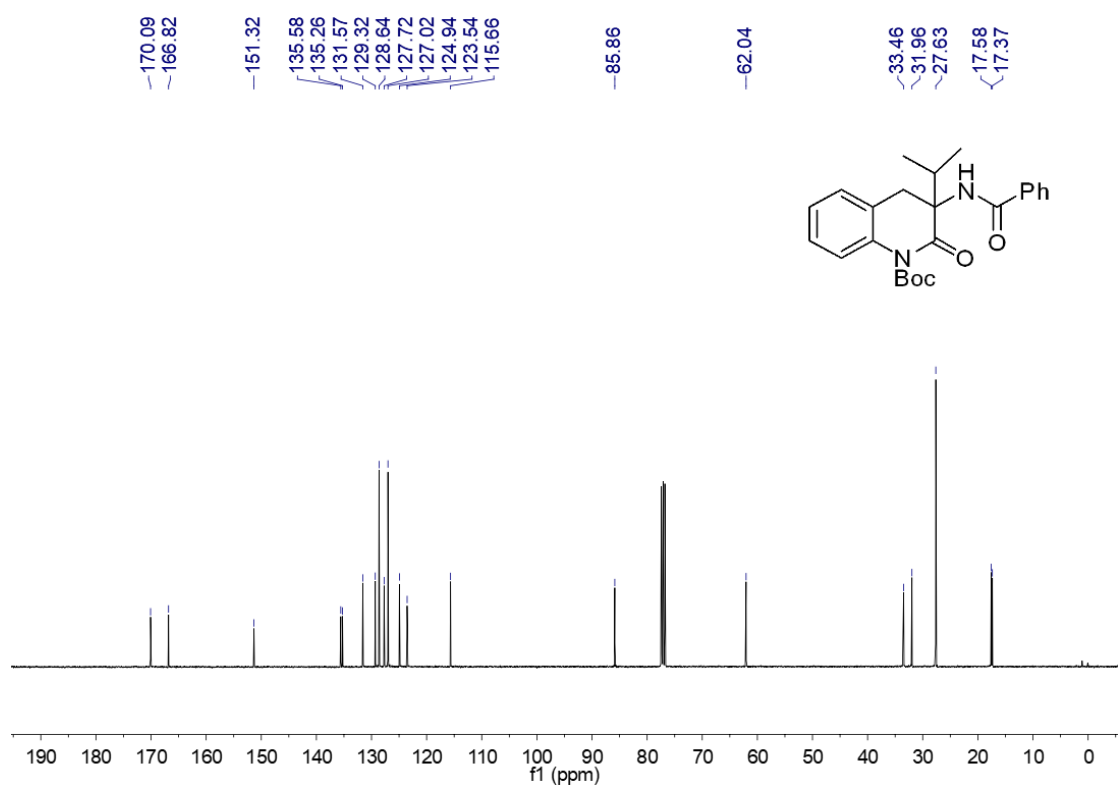

$^1\text{H}$  NMR (400 MHz,  $\text{CDCl}_3$ ) of compound **3hr**:

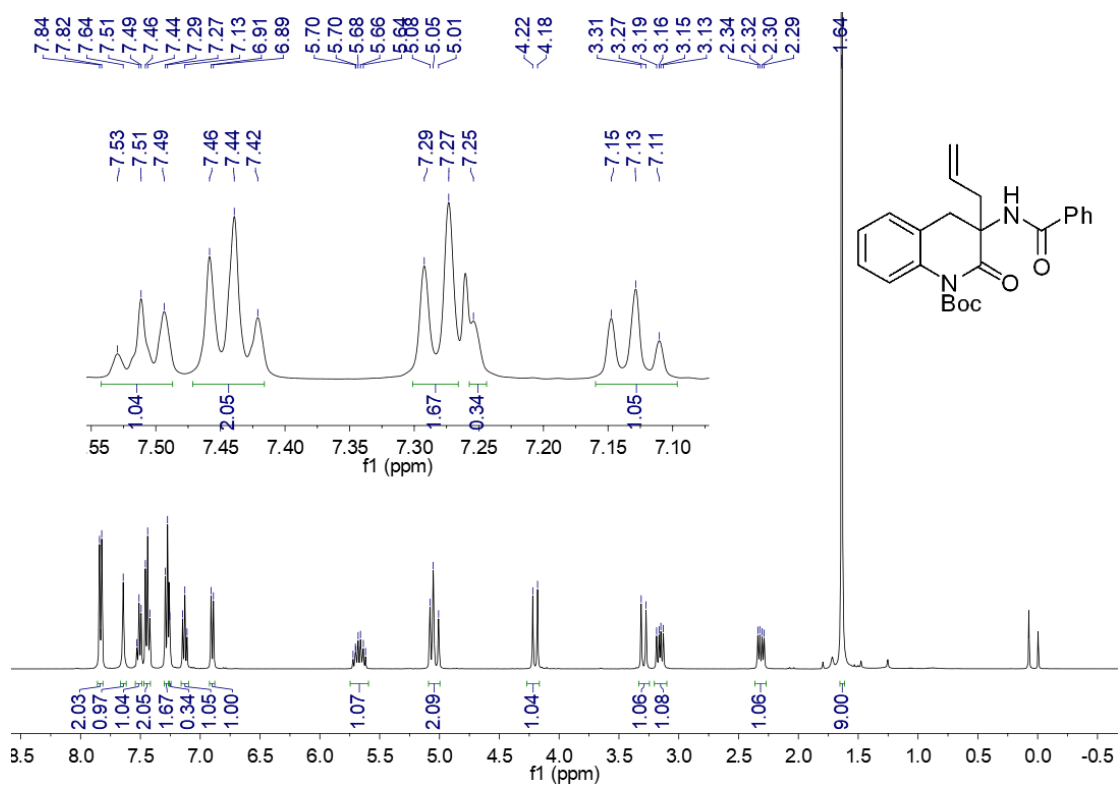

$^{13}\text{C}$  NMR (100 MHz,  $\text{CDCl}_3$ ) of compound **3hr**:

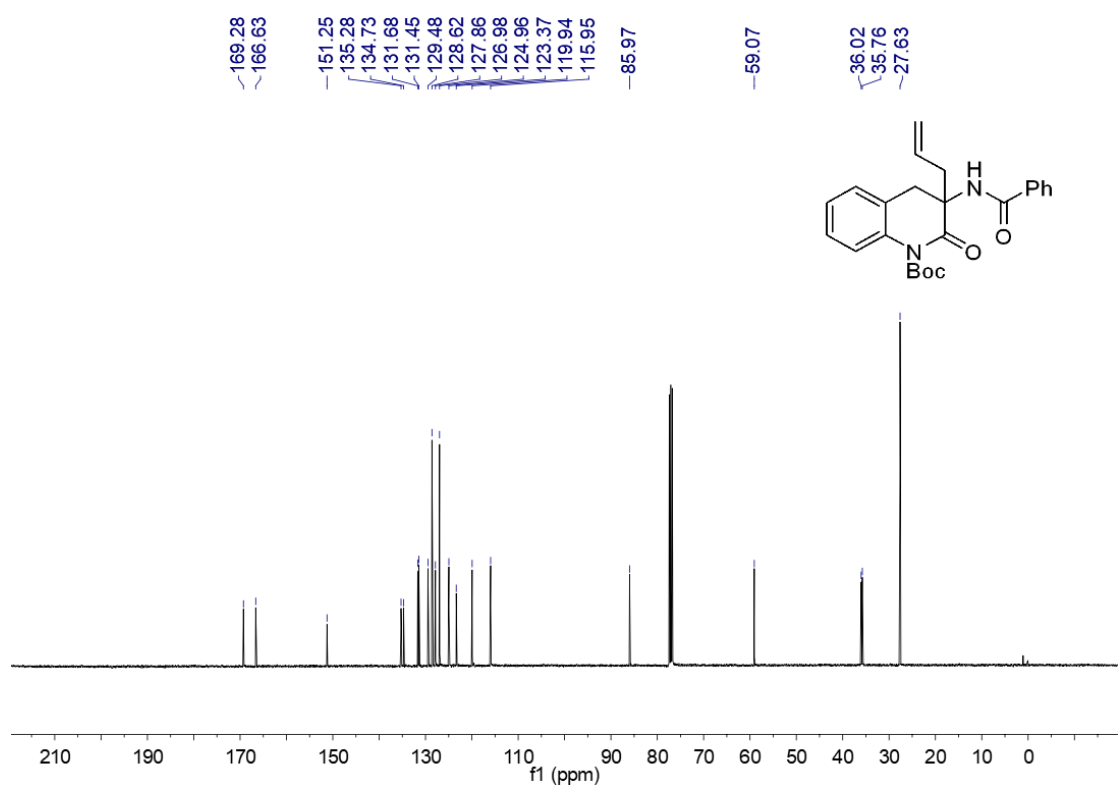

$^1\text{H}$  NMR (400 MHz,  $\text{CDCl}_3$ ) of compound **4**:

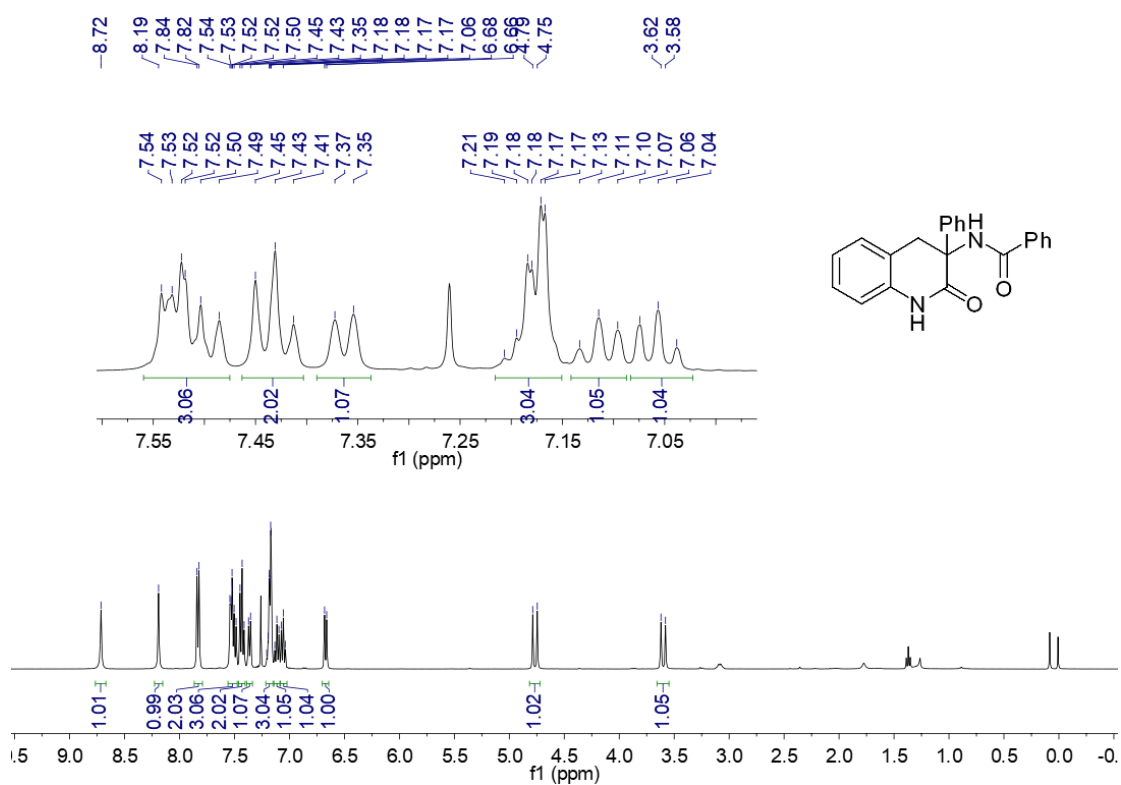

$^{13}\text{C}$  NMR (100 MHz,  $\text{CDCl}_3$ ) of compound **4**:

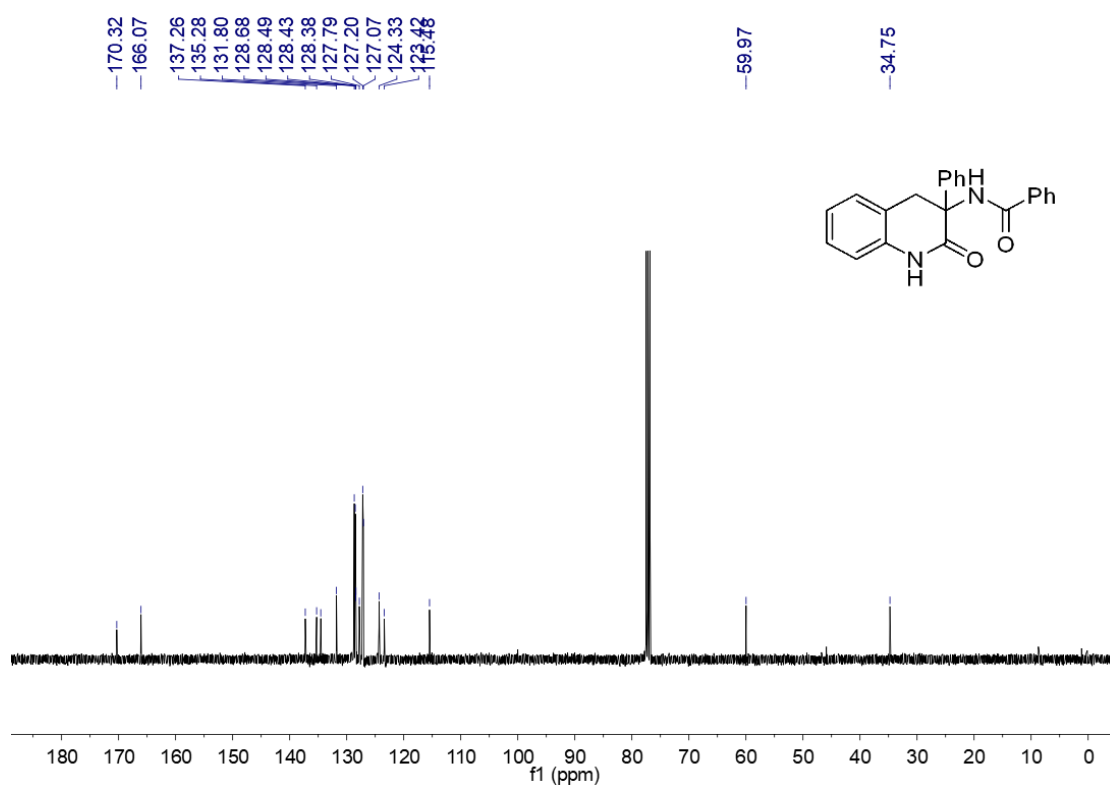

Chemical structure: CC(=O)NC(=O)c1c[nH]c2ccccc12C(=O)OCC

<sup>1</sup>H NMR spectrum (CDCl<sub>3</sub>) showing peaks and integrations:

- 10.54 ppm (s, 1H, integration 0.80)
- 7.16, 7.14, 7.12 ppm (m, 5H, integration 1.98)
- 6.93, 6.91, 6.89, 6.87, 6.85 ppm (m, 5H, integration 2.02)
- 4.00, 3.99, 3.98, 3.97, 3.96, 3.95, 3.94, 3.93, 3.92, 3.44, 3.40, 3.38, 3.34, 1.86 ppm (m, 4H, integration 2.00)
- 3.04 ppm (s, 3H, integration 2.33)
- 2.33 ppm (s, 3H, integration 3.04)
- 1.86 ppm (s, 3H, integration 3.00)

Chemical structure of 1-(2-ethoxycarbonyl-2-oxo-1-phenyl-1H-imidazol-5-yl)ethan-1-one is shown above the spectrum.

Peak list (ppm):

| Peak List (ppm) |
|-----------------|
| 170.07          |
| 168.31          |
| 165.48          |
| 137.50          |
| 128.43          |
| 127.85          |
| 122.85          |
| 121.84          |
| 115.29          |
| 62.01           |
| 61.42           |
| 34.83           |
| 22.93           |
| 14.11           |



$^1\text{H}$  NMR (400 MHz,  $\text{DMSO}-d_6$ ) of compound **I**:

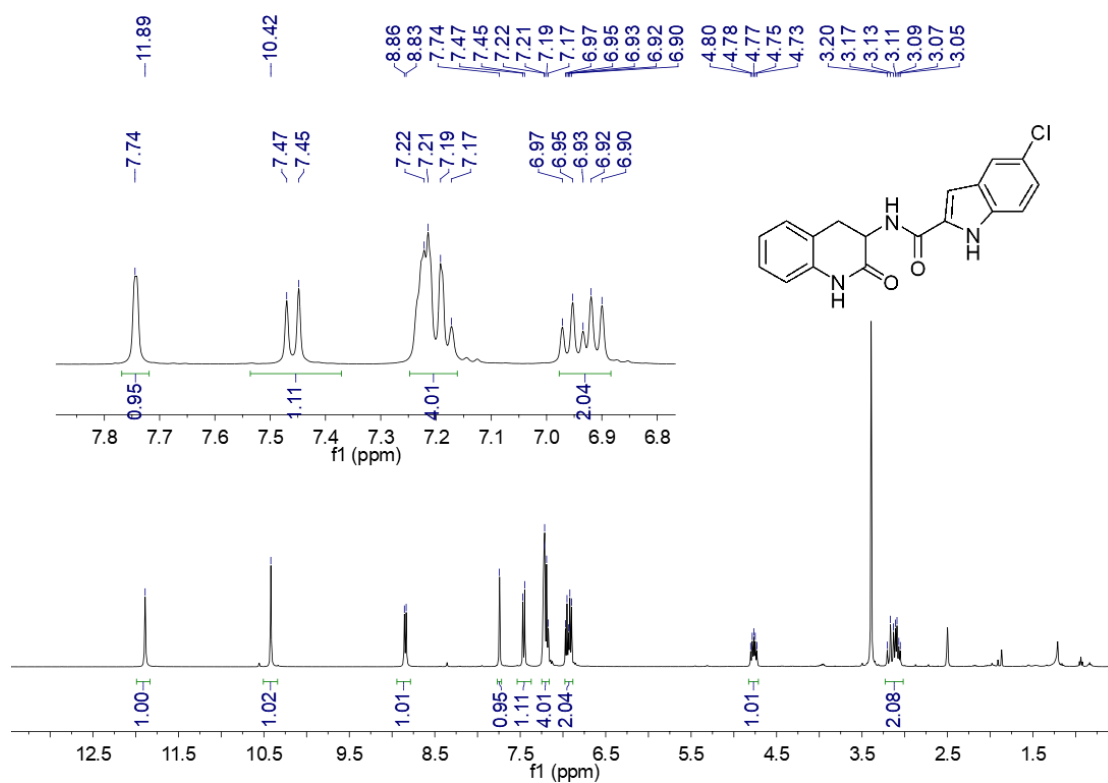

$^{13}\text{C}$  NMR (100 MHz,  $\text{DMSO}-d_6$ ) of compound **I**:

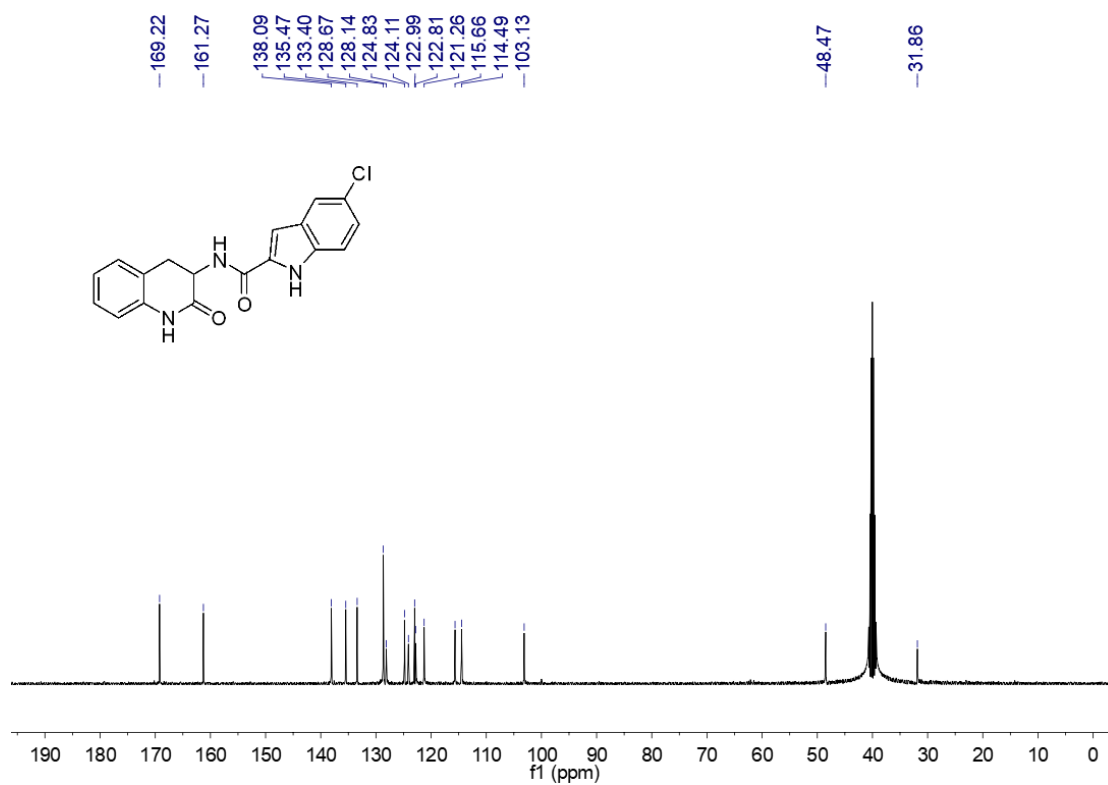

## 2. X-ray single crystal data for product 3aa

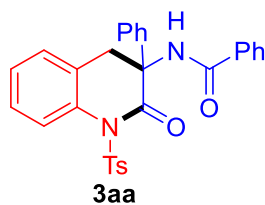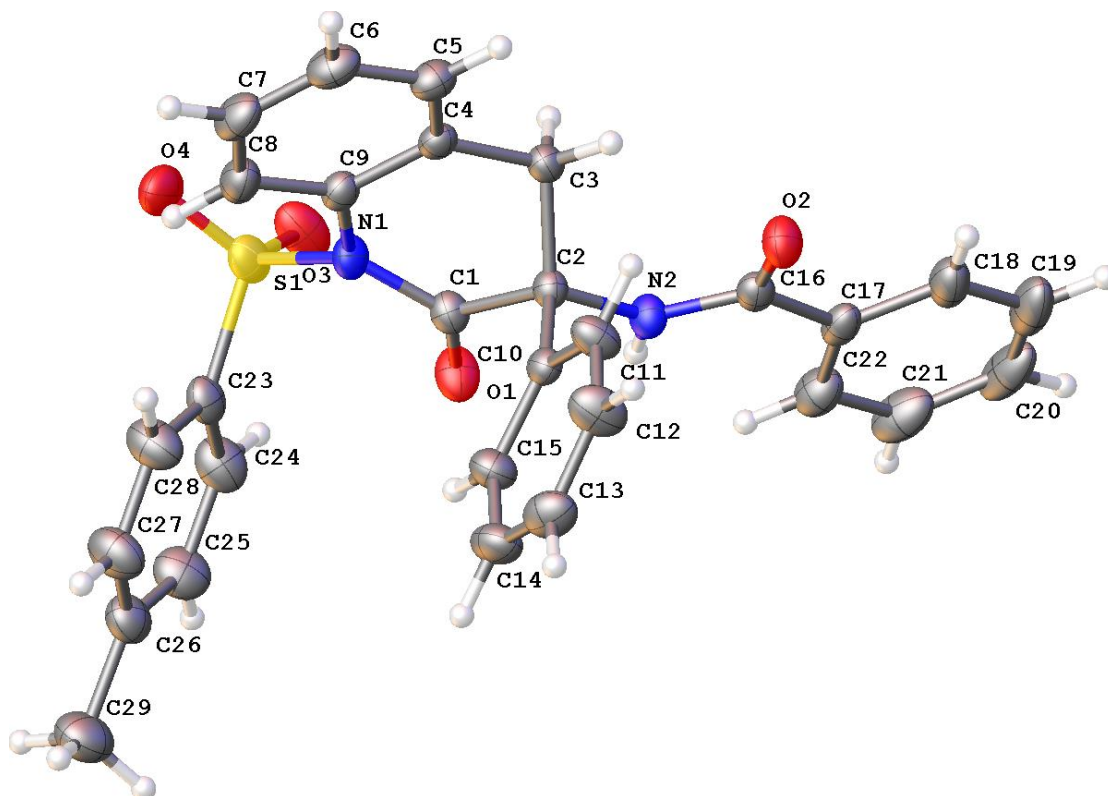

The thermal ellipsoid was drawn at the 30% probability level.

|                      |                                                                 |                 |
|----------------------|-----------------------------------------------------------------|-----------------|
| Identification code  | sf20190405a_0m                                                  |                 |
| Empirical formula    | C <sub>29</sub> H <sub>24</sub> N <sub>2</sub> O <sub>4</sub> S |                 |
| Formula weight       | 496.56                                                          |                 |
| Temperature          | 181.65 K                                                        |                 |
| Wavelength           | 0.71073 Å                                                       |                 |
| Crystal system       | Triclinic                                                       |                 |
| Space group          | P-1                                                             |                 |
| Unit cell dimensions | a = 8.3267(18) Å                                                | α = 97.684(3) ° |
|                      | b = 8.7156(19) Å                                                | β = 91.300(2) ° |
|                      | c = 16.902(4) Å                                                 | γ = 94.942(2) ° |
| Volume               | 1210.3(5) Å <sup>3</sup>                                        |                 |
| Z                    | 2                                                               |                 |
| Density (calculated) | 1.363 Mg/m <sup>3</sup>                                         |                 |

|                                   |                                             |
|-----------------------------------|---------------------------------------------|
| Absorption coefficient            | 0.173 mm <sup>-1</sup>                      |
| F(000)                            | 520                                         |
| Theta range for data collection   | 2.704 to 26.368 °                           |
| Index ranges                      | -10<=h<=10, -10<=k<=8, -16<=l<=21           |
| Reflections collected             | 6813                                        |
| Independent reflections           | 4826 [R(int) = 0.0142]                      |
| Completeness to theta = 25.242 °  | 98.3 %                                      |
| Absorption correction             | Semi-empirical from equivalents             |
| Max. and min. transmission        | 0.7455 and 0.6519                           |
| Refinement method                 | Full-matrix least-squares on F <sup>2</sup> |
| Data / restraints / parameters    | 4826 / 0 / 326                              |
| Goodness-of-fit on F <sup>2</sup> | 1.029                                       |
| Final R indices [I>2sigma(I)]     | R1 = 0.0480, wR2 = 0.1196                   |
| R indices (all data)              | R1 = 0.0630, wR2 = 0.1288                   |
| Extinction coefficient            | n/a                                         |
| Largest diff. peak and hole       | 0.347 and -0.319 e.Å <sup>-3</sup>          |
